# Supplementary material for: Randomized controlled trial of molnupiravir SARS-CoV-2 viral and antibody response in at-risk adult outpatients
Source: Springer Nature journal article supplement (doi:10.1038/s41467-024-45641-0), 2024-02-23
Supplement: MOESM1 [file 41467_2024_45641_MOESM1_ESM.pdf]

## Supplementary Material: Randomized controlled trial of molnupiravir SARS-CoV-2 viral and antibody response in at-risk adult outpatients

**Supplementary Figure 1a | Basic goodness of fit for the viral dynamic model.** DV, dependent variable (viral load). Population predictions are the typical predicted for each DV. Individual predictions use the empirical Bayes estimates of the parameters. NPDE: Normalised Prediction Distribution Errors, which are a type of weighted residual and should follow  $N(0,1)$ . Purple points represent samples above the LLOQ, black dots below. Samples from individual participants are joined and a red smooth is added to compare with either the line of unity (top row) or zero line (bottom row).

**a**

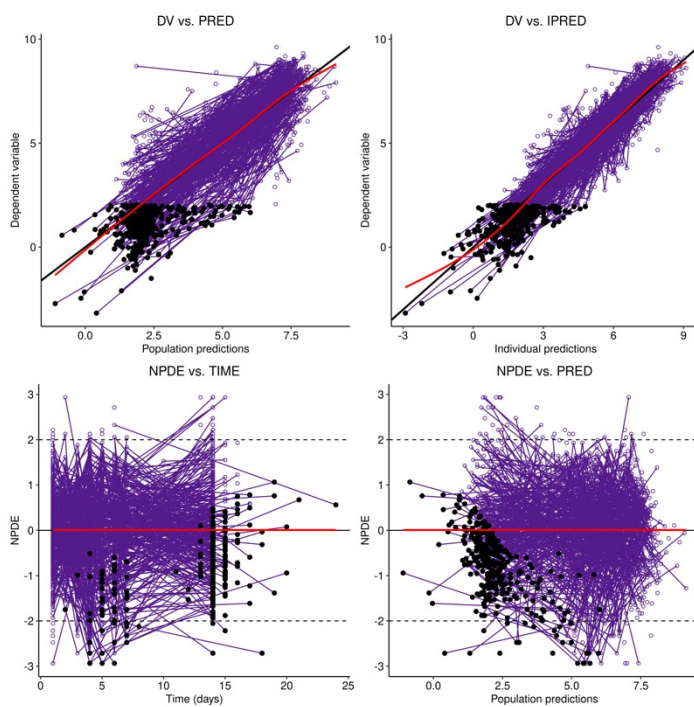

**Supplementary Figure 1b | Basic goodness of fit for the antibody dynamic model.** DV, dependent variable (spike antibody). Population predictions are the typical predicted for each DV. Individual predictions use the empirical Bayes estimates of the parameters. NPDE: Normalised Prediction Distribution Errors, which are a type of weighted residual and should follow  $N(0,1)$ . Purple points represent samples from each participant. Samples from individual participants are joined and a red smooth is added to compare with either the line of unity (top row) or zero line (bottom row).

**b**

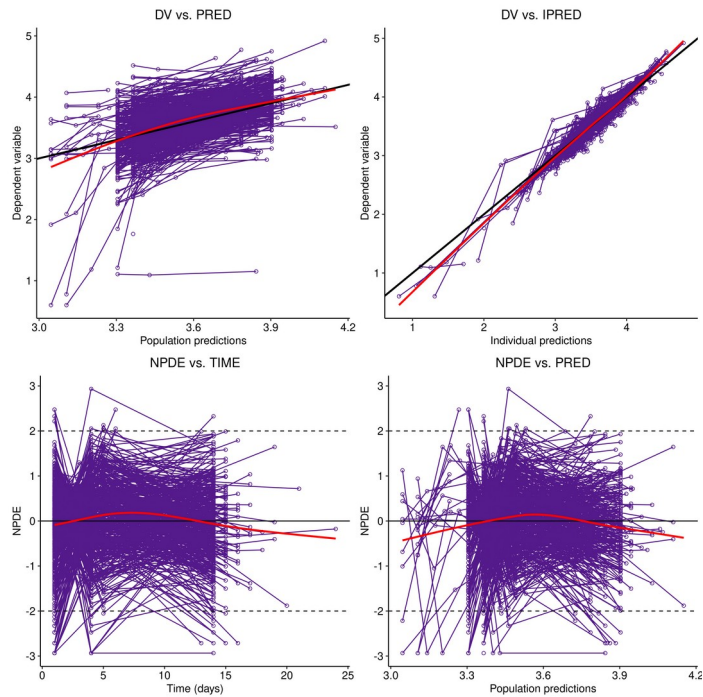

**Supplementary Figure 2a | Individual viral load trajectories (open circles) for Usual Care Participants in the intensive sampling arm.** Blue line represents population model prediction, red line represents the individual model prediction. black points are observations below the LLOQ

**a**

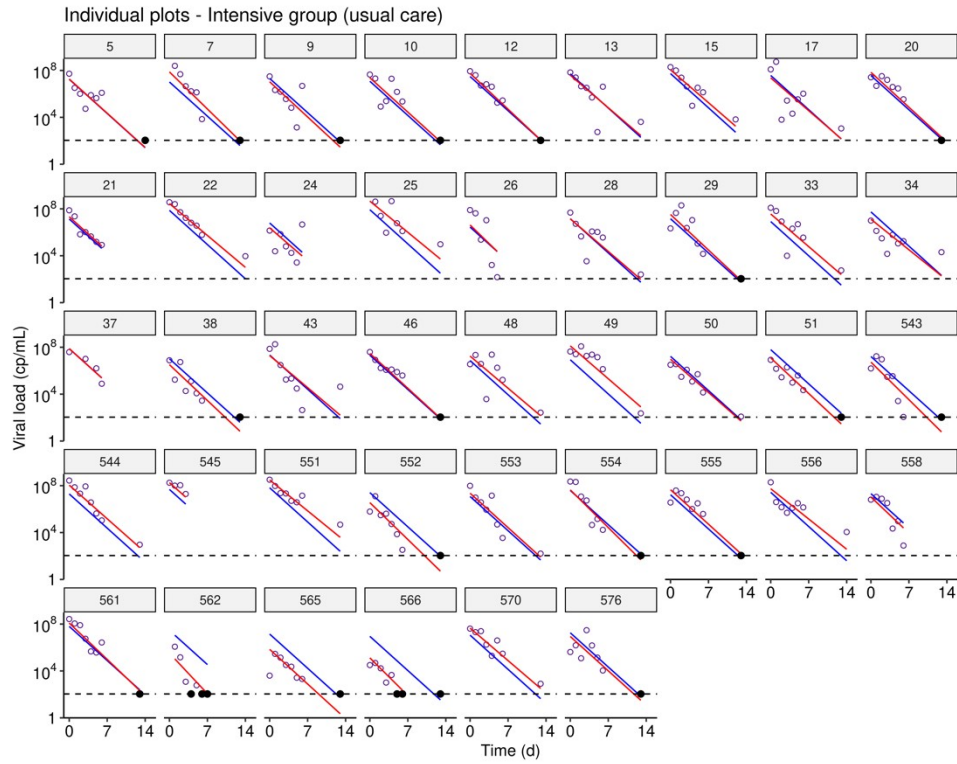

**Supplementary Figure 2b | Individual viral load trajectories (open circles) for molnupiravir-treated participants in the intensive sampling arm. Blue line represents population model prediction, red line represents the individual model prediction. Black points are observations below the LLOQ**

**b**

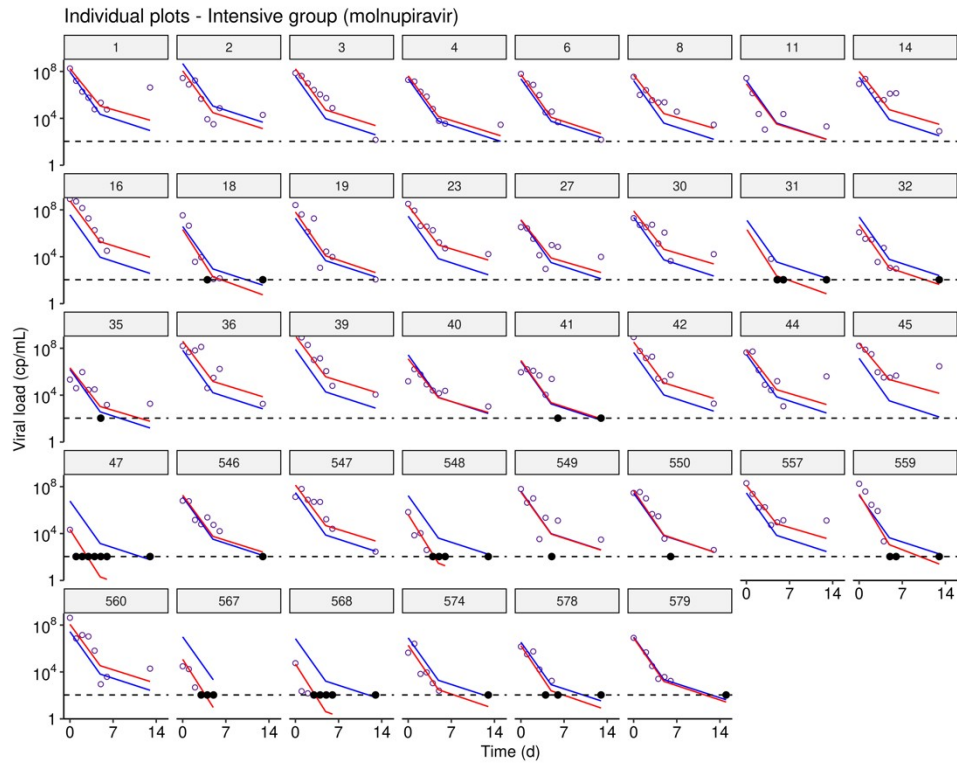

**Supplementary Figure 3 | Capillary CRP dynamics with time in molnupiravir treated (purple) and Usual Care (grey).** Lines are geometric means, error bars represent 95% CI of the geometric mean.

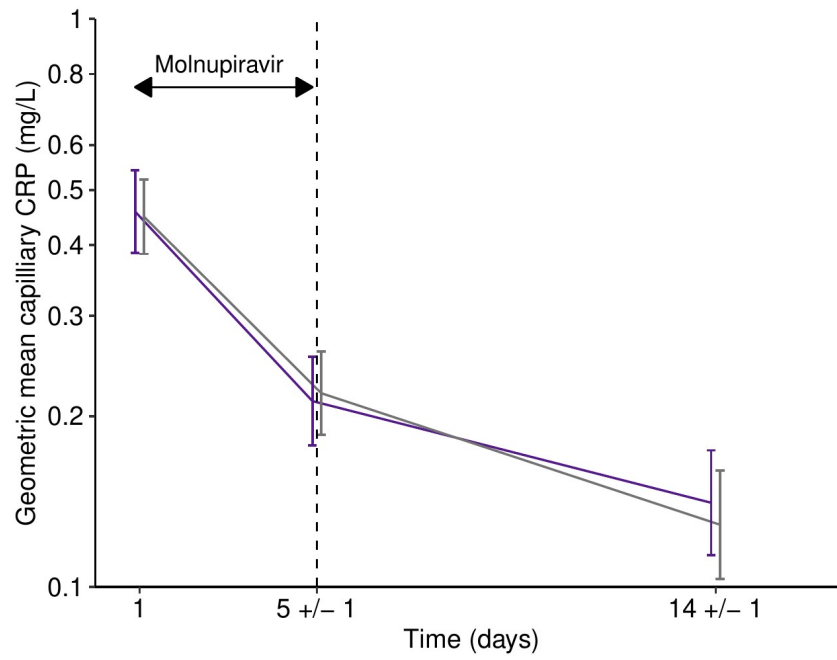

**Supplementary Figure 4 | Relationship between SARS-CoV-2 sequencing success and viral load.** Box- plot showing the quantitative PCR cycle threshold (CT) values for viral sequences with 90% coverage and mean read depth (MRD) of  $\times 10$  ( $n=1437$ ) in grey (PASS) and those ( $n=137$ ) that failed to reach this threshold in purple (FAIL). Means and standard deviations (boxed area) are shown. All samples failing sequencing had CT values  $>31$ . Sequencing of a further 19 samples with CT values of  $>38$  was not attempted. CT values for PASS samples were significantly lower than those for FAIL samples ( $p<0.001$  Mann-Whitney U test).

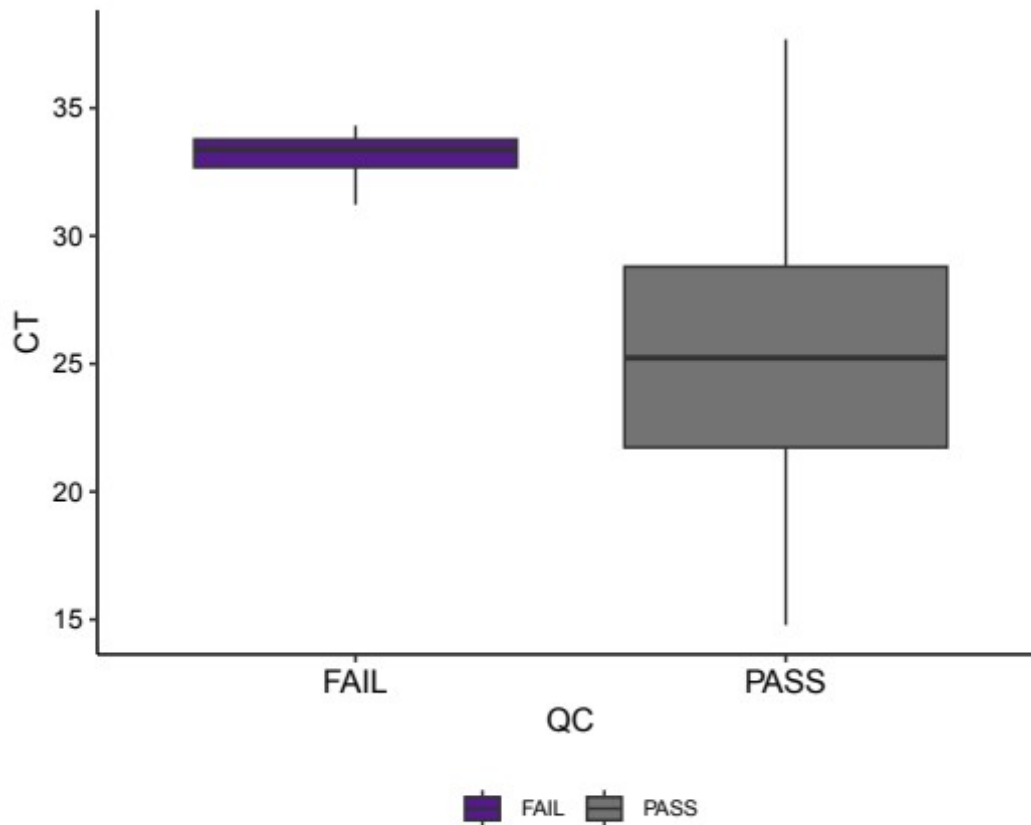

**Supplementary Figure 5 | Relationship between number of mutations above 1% single nucleotide allele frequencies detected per sample and the mean read depth of the sample.**

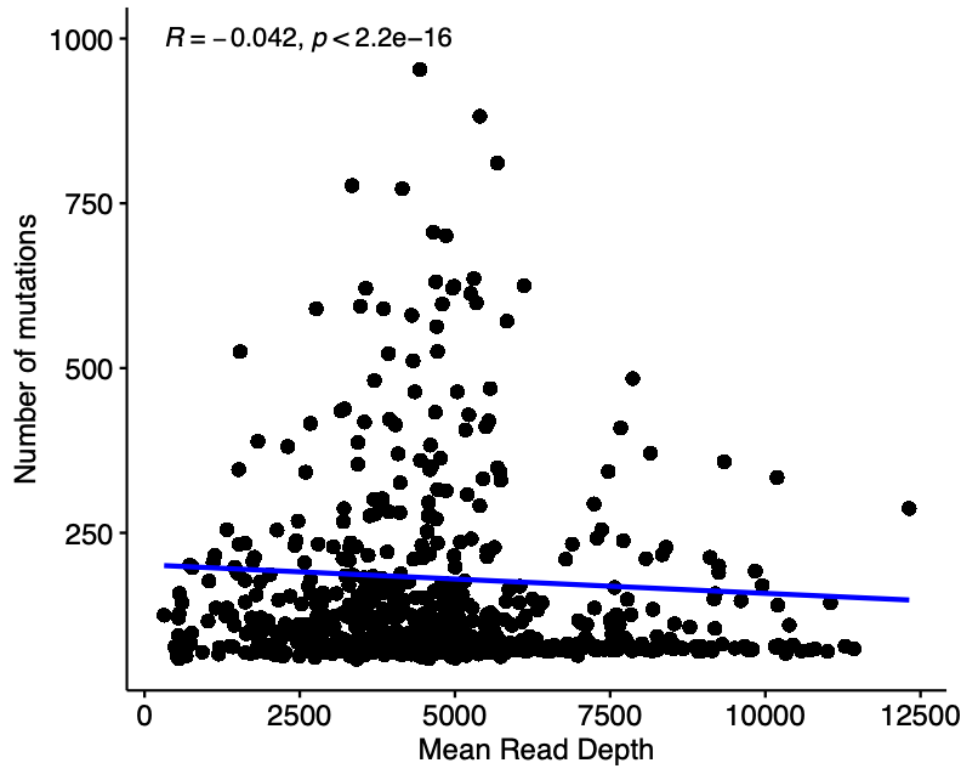

**Supplementary Figure 6 | Total transition and transversion mutations over time in viral sequences from molnupiravir and Usual Care participants.** Boxplots represent the total number of new single nucleotide polymorphisms (SNPs) above 1% allele frequency detected in samples collected from participants after baseline, divided by treatment group and type of nucleotide substitution. Samples from the molnupiravir treated group are shown in purple, while those from the Usual Care treatment group are shown in grey. Each data point aggregates all post-baseline timepoints for one participant, counting SNPs only once per individual. A total of 831 samples (excluding baseline) were analysed. A Mann-Whitney U test was used (\* p<0.05, \*\* p<0.01, \*\*\*\*p<0.001, \*\*\*\*\* p<0.0001).

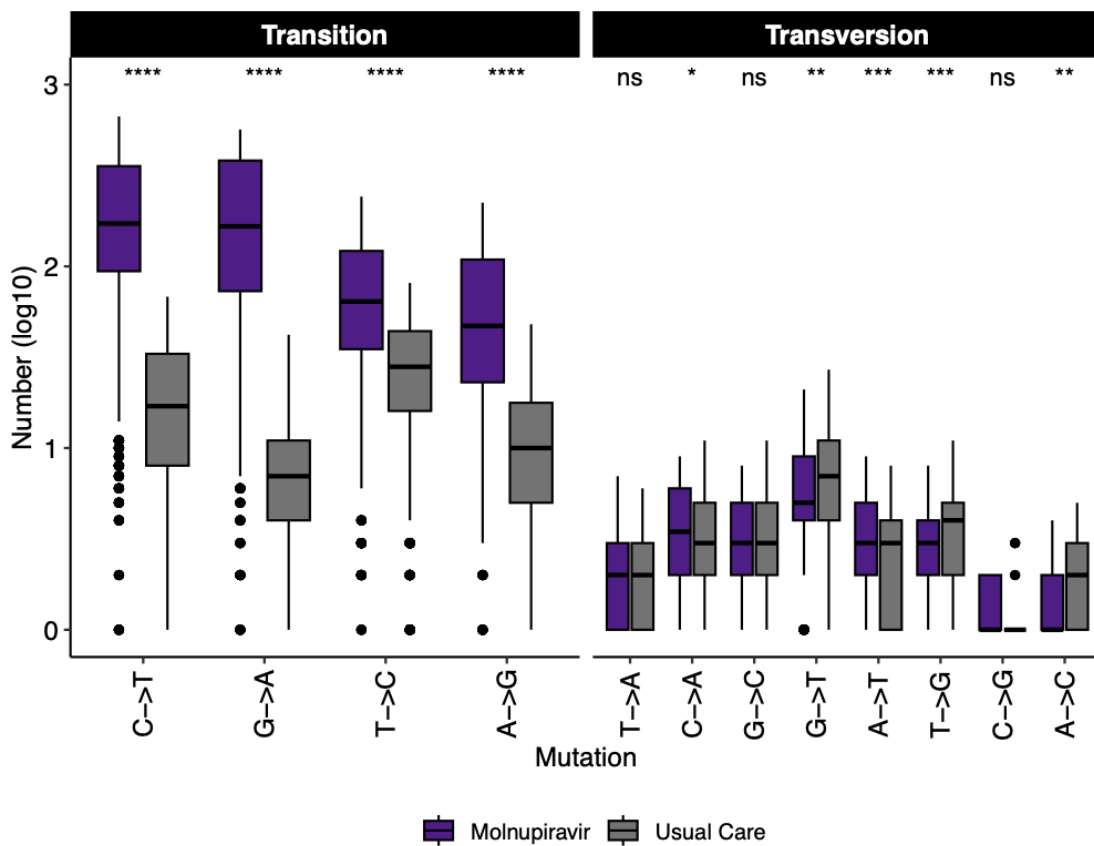



**Supplementary Figure 7 | Distribution along the SARS-CoV-2 genome of new post-baseline synonymous and non-synonymous mutations (allele frequency > 5%) at Day 5 (grey) and Day 14 (purple) in molnupiravir and Usual Care participants.** The x-axis shows the position along the SARS-CoV-2 genome. The y-axes show the mutation density (mutations at each position/total mutations) for each participant group.

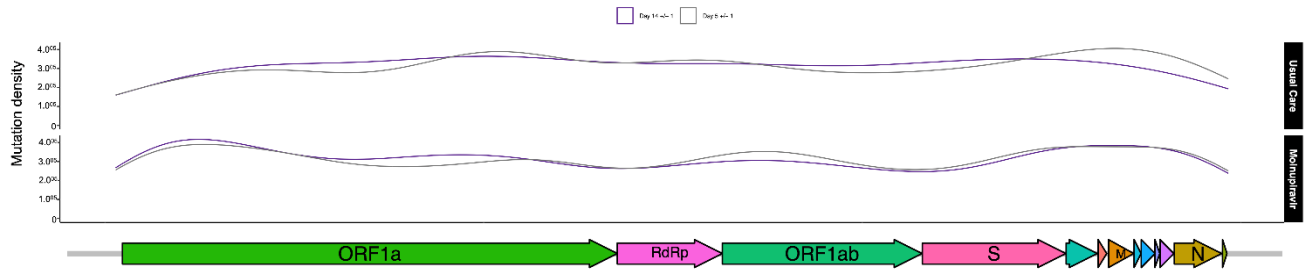

**Supplementary Figure 8 | Scatter plot showing the number of new post-baseline mutations above 1% allele frequency (y axis) compared to the transition fraction (number of transitions/total transitions plus transversions) per sample for Days 5 and 14 (x axis). Samples are colour-coded by the treatment received: molnupiravir: purple, and Usual Care: grey. The black dotted line represents the transition fraction threshold below which all Usual Care samples cluster. Day 14 molnupiravir-treated samples which cluster with Day 14 Usual Care samples are shown in red.**

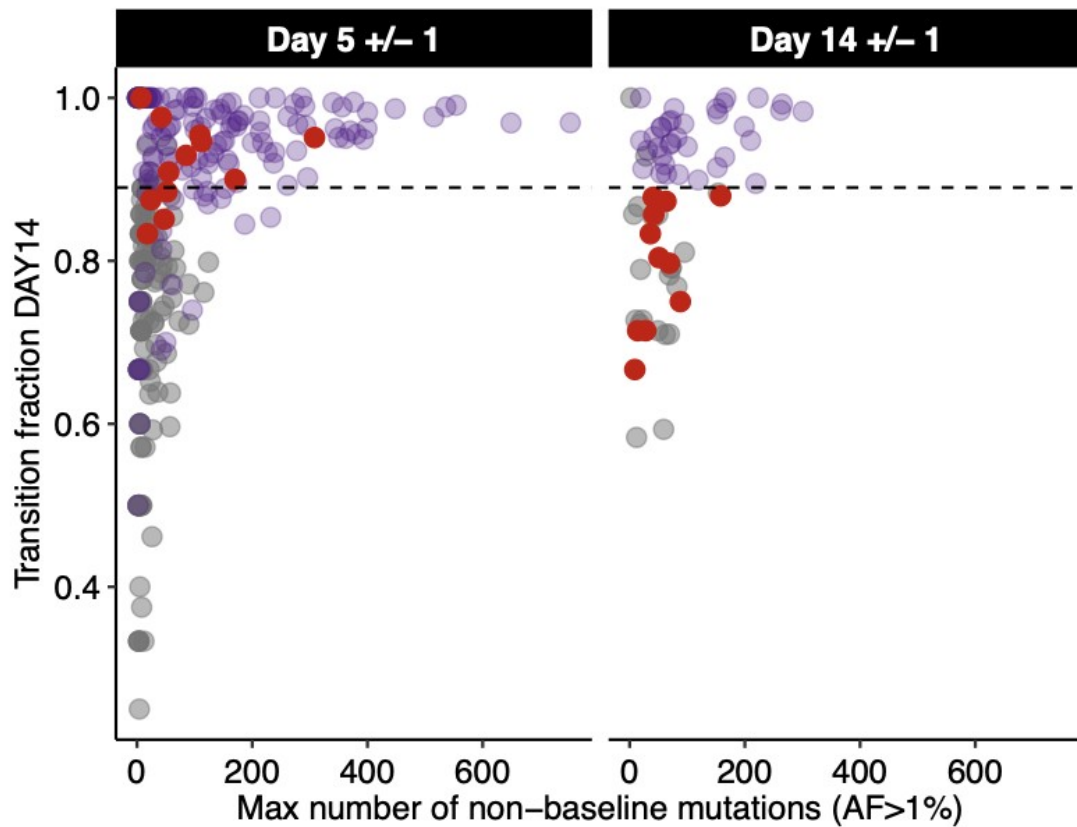

**Supplementary Figure 9 | Numbers and frequency of participants with new post-baseline spike escape or molnupiravir resistance mutations at >1% frequency during treatment (Days 2-5) or at Day 14.** Participants are divided by treatment (molnupiravir or Usual Care). 'Resolved' participants are those that do not have detectable viral load at Day 14, and 'persistent' participants are those with detectable viral load above LLOQ at  $\geq$  Day 14. Where a participant has more than one sample taken between Days 2-5, the mean number of relevant SNPs detected/participant is included. The size of the circle indicates the number of participants in that group with one or more relevant new mutations by mutation-category and time point. The heat map shows the proportion of participants in each group with a new relevant mutation by mutation-category and time point.

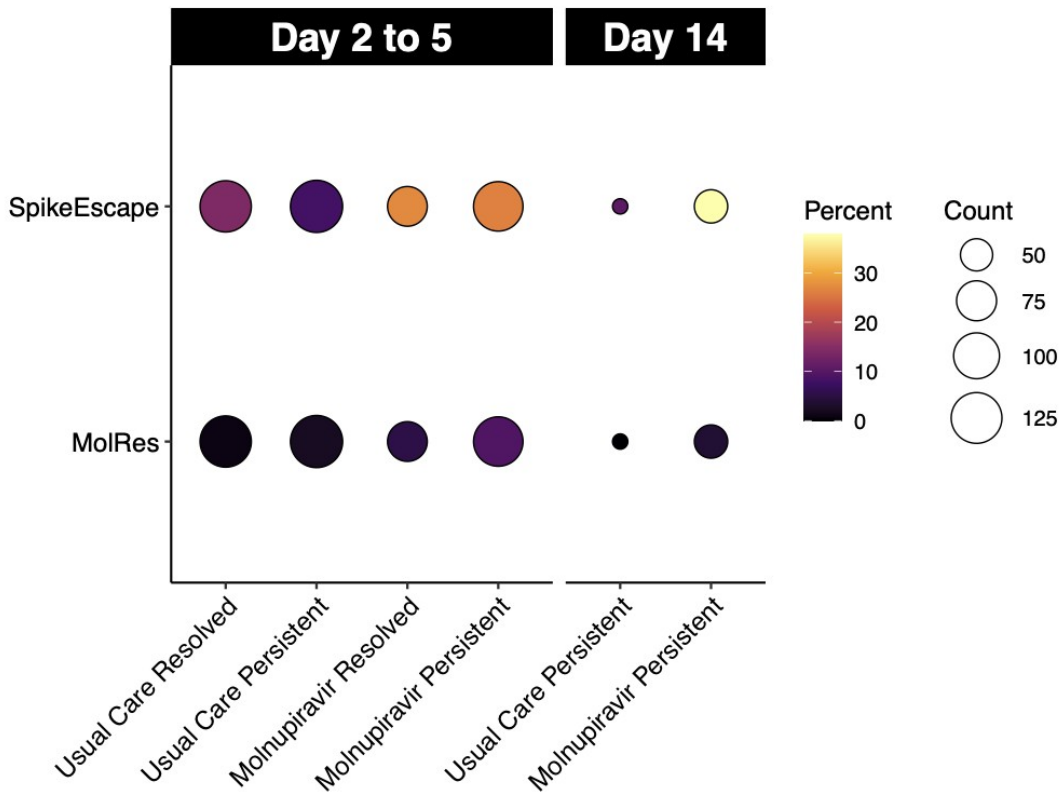

**Supplementary Figure 10 | Viral load trajectories (mean and std deviation) for participants with any ORF1a post-baseline missense mutation at any time point which was above the consensus level (allele frequency (AF) >50%) in red, below the consensus level (1-50%) in purple or with no mutations (grey), for molnupiravir-treated and Usual Care groups. Participants included (441) were required to have viral load data for baseline, Day 5 and Day 14 and sequence data for all positive viral loads.**

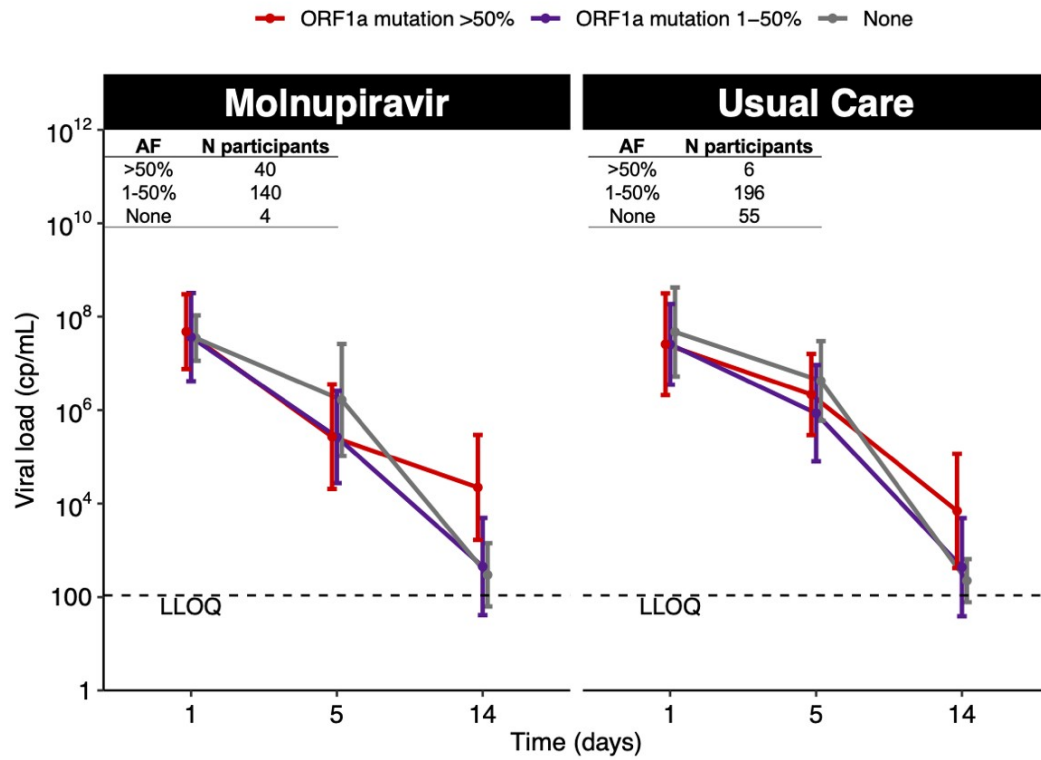

**Supplementary Figure 11 | Structure of the SARS-CoV-2 RNA-dependent RNA polymerase based on PDB:6M71 (<https://www.rcsb.org/structure/6m71>). The catalytic site of the protein is highlighted in orange with the recurrent mutation found in our study at position 716 highlighted in purple.**

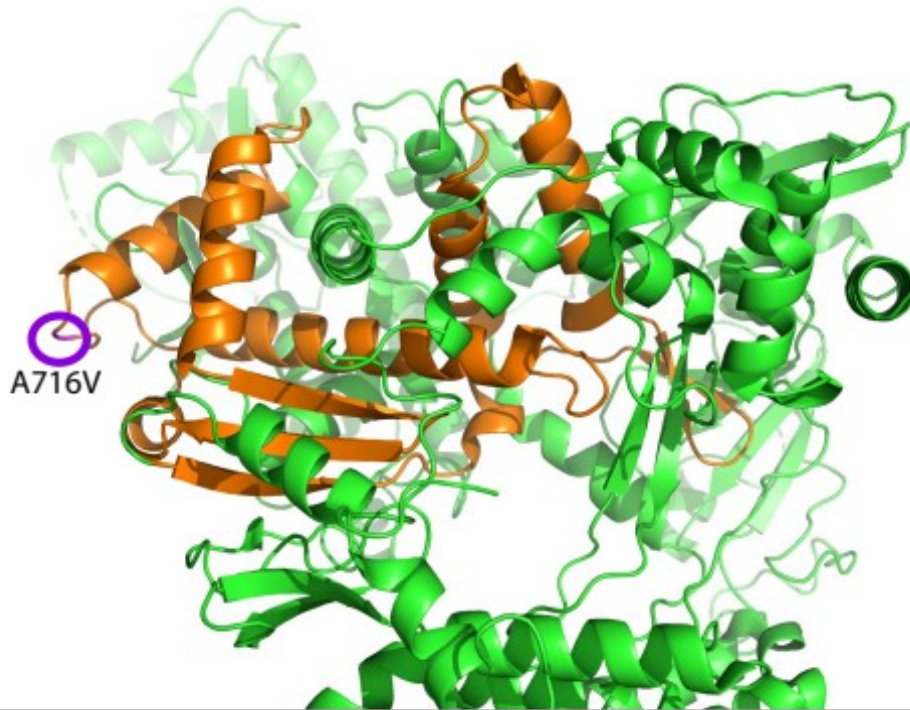

**Supplementary Figure 12 | Viral culture results.** Plots demonstrating the difference between swab samples from Usual Care (n=558) or molnupiravir-treated (n=425) samples tested for viable virus culture in Calu-3 cells. Samples were characterised as culture positive (filled bar) requiring both observed cytopathogenic effects and a positive lateral flow immunochromatography test of culture medium, and otherwise were designated culture negative (empty bar). a, The participant's viral load at time of sample as determined by PCR (median  $\pm$  95% CI). b, The number of transport days between the swab collection and arrival at laboratory (geometric mean  $\pm$  95% CI). c, The number of days-post symptom onset at time of sample collection. d, Supernatant from a subset of Calu-3 cultured samples were tested by qRT-PCR using primers to SARS-CoV-2 N gene (n= 31) (geometric mean  $\pm$  95% CI). One-way ANOVA was used to calculate significance between specific groups, where \*\*\*\* =  $p < 0.0001$ , ns = not significant.

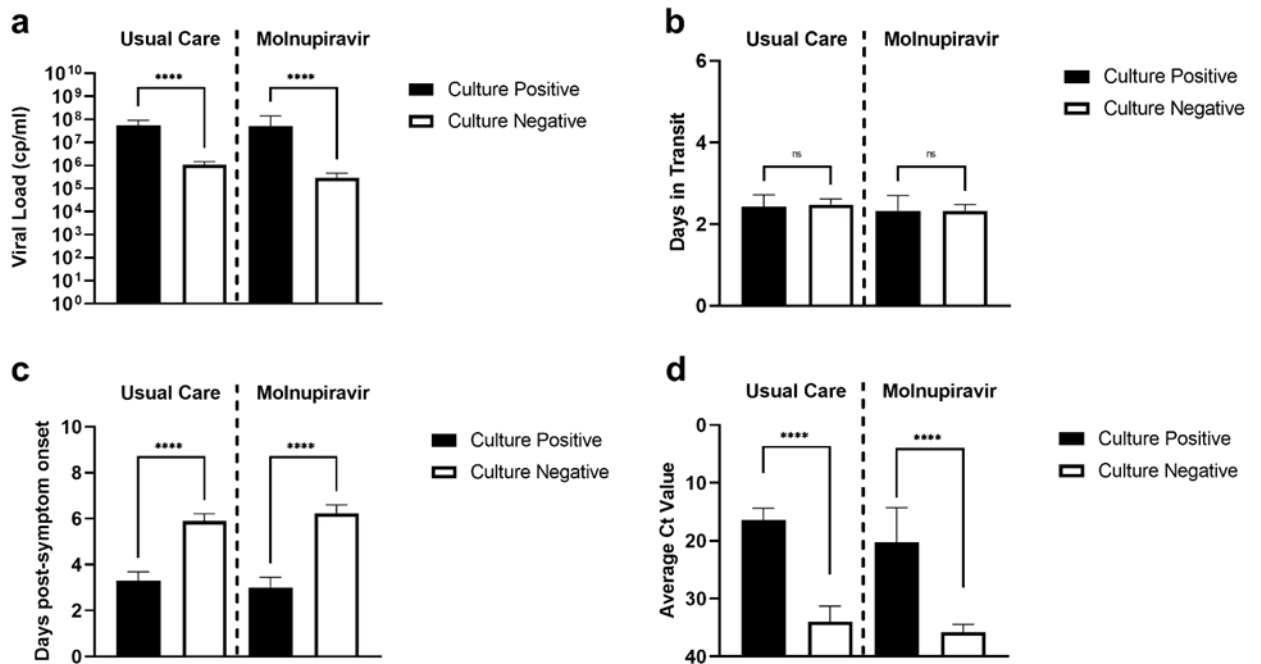

**Supplementary Table 1 | Number of participants and collected samples for both less intensive and intensive cohorts for baseline (Day 1), Day 5 and Day 14.** The numbers (frequency) successfully sequenced is shown overall and for those with paired baseline and either/both Days 5 and 14 samples.

| Treatment                                                              | Day 1                  |                   | Day 5                  |                   | Day 14                 |                   |
|------------------------------------------------------------------------|------------------------|-------------------|------------------------|-------------------|------------------------|-------------------|
|                                                                        | Less intensely sampled | Intensely sampled | Less intensely sampled | Intensely sampled | Less intensely sampled | Intensely sampled |
| <b>Total participants</b>                                              | 215                    | 38                | 207                    | 38                | 171                    | 34                |
| <b>Total participants sequenced</b>                                    | 212 (98.6%)            | 37 (97.4%)        | 124 (59.9%)            | 32 (84.2%)        | 33 (19.3%)             | 13 (34.2%)        |
| <b>Participants with Paired baseline + at least one other sequence</b> | 130 (60.5%)            | 31 (81.6%)        | 124 (59.9%)            | 31 (81.6%)        | 33 (19.3%)             | 13 (34.2%)        |
| <b>Total participants</b>                                              | 282                    | 42                | 246                    | 42                | 208                    | 35                |
| <b>Total participants sequenced</b>                                    | 277 (98.2%)            | 40 (95.2%)        | 175 (71.13%)           | 41 (97.6%)        | 17 (8.1%)              | 4 (11.4%)         |
| <b>Participants with Paired baseline + at least one other sequence</b> | 174 (61.7%)            | 40 (95.2%)        | 171 (69.5%)            | 40 (95.2%)        | 17 (8.1%)              | 4 (11.4%)         |

**Supplementary Table 2 | Lineage assignment of baseline samples (Day 1) from participants for whom viral sequence was available by treatment group.**

| VOC_VUI              | LINEAGE   | Number of participants | Percentage | Treatment    |
|----------------------|-----------|------------------------|------------|--------------|
| Omicron (BA.2-like)  | BA.2      | 161                    | 72.85%     | Molnupiravir |
| Omicron (BA.2-like)  | BA.2.9    | 11                     | 4.98%      | Molnupiravir |
| Omicron (BA.2-like)  | BA.2.3    | 10                     | 4.52%      | Molnupiravir |
| Omicron (BA.2-like)  | BA.2.1    | 8                      | 3.62%      | Molnupiravir |
| Omicron (BA.2-like)  | BA.2.23   | 8                      | 3.62%      | Molnupiravir |
| Omicron (BA.2-like)  | BA.2.10   | 4                      | 1.81%      | Molnupiravir |
| Omicron (BA.2-like)  | BA.2.18   | 3                      | 1.36%      | Molnupiravir |
| Omicron (BA.1-like)  | BA.1.1    | 2                      | 0.90%      | Molnupiravir |
| Omicron (BA.2-like)  | BA.2.22   | 2                      | 0.90%      | Molnupiravir |
| Omicron (BA.2-like)  | BA.2.37   | 2                      | 0.90%      | Molnupiravir |
| Omicron (BA.2-like)  | BA.2.3.9  | 1                      | 0.45%      | Molnupiravir |
| Omicron (BA.2-like)  | BA.2.36   | 1                      | 0.45%      | Molnupiravir |
| Omicron (BA.2-like)  | BA.2.39   | 1                      | 0.45%      | Molnupiravir |
| Omicron (BA.2-like)  | BA.2.50   | 1                      | 0.45%      | Molnupiravir |
| Omicron (BA.2-like)  | BA.2.51   | 1                      | 0.45%      | Molnupiravir |
| Omicron (BA.2-like)  | BA.2.52   | 1                      | 0.45%      | Molnupiravir |
| Omicron (BA.2-like)  | BA.2.8    | 1                      | 0.45%      | Molnupiravir |
| Omicron (BA.2-like)  | XN        | 1                      | 0.45%      | Molnupiravir |
| Omicron (Unassigned) | XL        | 1                      | 0.45%      | Molnupiravir |
| Omicron (Unassigned) | XQ        | 1                      | 0.45%      | Molnupiravir |
| Omicron (BA.2-like)  | BA.2      | 203                    | 75.19%     | Usual Care   |
| Omicron (BA.2-like)  | BA.2.9    | 16                     | 5.93%      | Usual Care   |
| Omicron (BA.2-like)  | BA.2.3    | 10                     | 3.70%      | Usual Care   |
| Omicron (BA.2-like)  | BA.2.1    | 6                      | 2.22%      | Usual Care   |
| Omicron (BA.2-like)  | BA.2.23   | 6                      | 2.22%      | Usual Care   |
| Omicron (BA.2-like)  | BA.2.10   | 5                      | 1.85%      | Usual Care   |
| Omicron (BA.2-like)  | BA.2.22   | 3                      | 1.11%      | Usual Care   |
| Omicron (BA.2-like)  | BA.2.18   | 2                      | 0.74%      | Usual Care   |
| Omicron (BA.2-like)  | BA.2.38   | 2                      | 0.74%      | Usual Care   |
| Omicron (XE-like)    | XE        | 2                      | 0.74%      | Usual Care   |
| Omicron (BA.1-like)  | BA.1.1    | 1                      | 0.37%      | Usual Care   |
| Omicron (BA.1-like)  | BA.1.1.15 | 1                      | 0.37%      | Usual Care   |
| Omicron (BA.2-like)  | BA.2.10.1 | 1                      | 0.37%      | Usual Care   |
| Omicron (BA.2-like)  | BA.2.31   | 1                      | 0.37%      | Usual Care   |
| Omicron (BA.2-like)  | BA.2.41   | 1                      | 0.37%      | Usual Care   |
| Omicron (BA.2-like)  | BA.2.45   | 1                      | 0.37%      | Usual Care   |
| Omicron (BA.2-like)  | BA.2.5    | 1                      | 0.37%      | Usual Care   |
| Omicron (BA.2-like)  | BA.2.50   | 1                      | 0.37%      | Usual Care   |



|                             |         |   |       |            |
|-----------------------------|---------|---|-------|------------|
| <b>Omicron (BA.2-like)</b>  | BA.2.55 | 1 | 0.37% | Usual Care |
| <b>Omicron (BA.2-like)</b>  | BA.2.6  | 1 | 0.37% | Usual Care |
| <b>Omicron (BA.2-like)</b>  | BA.2.65 | 1 | 0.37% | Usual Care |
| <b>Omicron (BA.2-like)</b>  | BA.2.8  | 1 | 0.37% | Usual Care |
| <b>Omicron (BA.5-like)</b>  | BF.1    | 1 | 0.37% | Usual Care |
| <b>Omicron (Unassigned)</b> | BA.2    | 1 | 0.37% | Usual Care |
| <b>Omicron (Unassigned)</b> | XQ      | 1 | 0.37% | Usual Care |

---

**Supplementary Table 3 | Baseline characteristics of the thirteen molnupiravir-treated group samples with viral sequences at day 14 which appeared to have low mutagenesis ( $\leq 89\%$ ) comparable to the Usual Care group. Asterisks highlight the four participants who also had Day 5 transition fractions similar to the Usual Care group. nMut refers to the number of mutations detected at different allele frequency thresholds.**

| Participant ID | Time (Days) | Transition Fraction | nMut (>1%) | nMut (>5%) | nMut (>50%) | CRP (mg/L) | Sex | Lung disease | Heart disease | Kidney disease | Liver disease | Neuro disease | Diabetes | Immune disease |
|----------------|-------------|---------------------|------------|------------|-------------|------------|-----|--------------|---------------|----------------|---------------|---------------|----------|----------------|
| 2              | 4           | 1.000               | 7          | 0          | 0           | 0.18       | M   | Yes          | No            | Yes            | No            | No            | Yes      | Yes            |
| 80             | 4           | 0.909               | 55         | 0          | 0           | 0.19       | F   | Yes          | Yes           | No             | No            | No            | No       | No             |
| 98             | 4           | 1.000               | 2          | 0          | 0           | 0.65       | F   | Yes          | No            | No             | No            | No            | No       | Yes            |
| 113*           | 4           | 0.885               | 52         | 38         | 0           | 0.15       | F   | No           | No            | No             | No            | No            | No       | No             |
| 181            | 4           | 0.951               | 308        | 3          | 2           | 0.13       | M   | No           | No            | No             | No            | No            | No       | No             |
| 227            | 4           | 0.900               | 170        | 3          | 0           | 1.03       | F   | No           | No            | No             | No            | No            | No       | No             |
| 246*           | 4           | 0.833               | 18         | 4          | 2           | 0.2        | M   | No           | No            | No             | No            | No            | No       | No             |
| 248            | 4           | 0.954               | 109        | 2          | 0           | 0.07       | F   | No           | No            | No             | No            | No            | No       | No             |
| 286            | 4           | 0.976               | 42         | 0          | 0           | 0.13       | F   | No           | No            | No             | No            | No            | No       | No             |
| 308*           | 4           | 0.851               | 47         | 17         | 0           | 0.18       | F   | No           | No            | No             | No            | No            | Yes      | No             |
| 366*           | 4           | 0.875               | 24         | 17         | 0           | 0.29       | F   | No           | Yes           | No             | No            | No            | Yes      | No             |
| 2              | 5           | 0.919               | 135        | 61         | 0           | 0.18       | M   | Yes          | No            | Yes            | No            | No            | Yes      | Yes            |
| 387            | 5           | 0.946               | 112        | 1          | 2           | 0.18       | M   | No           | Yes           | No             | No            | No            | No       | No             |
| 536            | 5           | 0.929               | 85         | 7          | 2           | 0.6        | F   | Yes          | No            | No             | No            | No            | Yes      | No             |
| 2              | 6           | 0.973               | 73         | 69         | 0           | 0.18       | M   | Yes          | No            | Yes            | No            | No            | Yes      | Yes            |
| 2              | 14          | 0.750               | 88         | 13         | 8           | 0.04       | M   | Yes          | No            | Yes            | No            | No            | Yes      | Yes            |
| 80             | 14          | 0.797               | 69         | 15         | 4           | 0.17       | F   | Yes          | Yes           | No             | No            | No            | No       | No             |
| 98             | 14          | 0.880               | 158        | 33         | 24          | 0.31       | F   | Yes          | No            | No             | No            | No            | No       | Yes            |
| 113            | 14          | 0.714               | 28         | 20         | 0           | 0.09       | F   | No           | No            | No             | No            | No            | No       | No             |
| 181            | 14          | 0.857               | 42         | 20         | 38          | 0.08       | M   | No           | No            | No             | No            | No            | No       | No             |
| 246            | 14          | 0.804               | 51         | 29         | 44          | 0.2        | M   | No           | No            | No             | No            | No            | No       | No             |
| 248            | 14          | 0.833               | 36         | 28         | 14          | 0.15       | F   | No           | No            | No             | No            | No            | No       | No             |

|     |    |       |    |    |    |      |   |     |     |    |    |    |     |    |
|-----|----|-------|----|----|----|------|---|-----|-----|----|----|----|-----|----|
| 286 | 14 | 0.667 | 9  | 6  | 0  | 0.09 | F | No  | No  | No | No | No | No  | No |
| 366 | 14 | 0.878 | 41 | 0  | 34 | 0.27 | F | No  | Yes | No | No | No | Yes | No |
| 387 | 14 | 0.873 | 63 | 40 | 38 | 0.58 | M | No  | Yes | No | No | No | No  | No |
| 536 | 14 | 0.714 | 14 | 12 | 0  | 0.24 | F | Yes | No  | No | No | No | Yes | No |
| 227 | 15 | 0.857 | 77 | 24 | 22 | 0.35 | F | No  | No  | No | No | No | No  | No |
| 308 | 16 | 0.611 | 18 | 15 | 6  | 0.21 | F | No  | No  | No | No | No | Yes | No |

---

**Supplementary Table 4 | Putative post-baseline resistance mutations identified at Day 14 both at allele frequency above 5% and at consensus level (>50%).**

Detailed are mutations in NSP12/RdRp that are considered to be associated with drug resistance to molnupiravir based on comparative genomics using the SARS2-ResistanceDB (retrieved from <https://github.com/ucl-pathgenomics/SARS2-ResistanceDB>), and Spike mutations considered to be relevant for immune system escape retrieved from the Pokay database (<https://github.com/nodrogluap/pokay>).

| <b>GENE</b>  | <b>Change Observed</b> | <b>Effect</b>             | <b>AF</b> | <b>Number of participants</b> |
|--------------|------------------------|---------------------------|-----------|-------------------------------|
| <b>NSP12</b> | V560L                  | Predicted Resistance Site | >5%       | 1                             |
| <b>NSP12</b> | V234I                  | Predicted Resistance Site | >50%      | 1                             |
| <b>S</b>     | A831V                  | Immune Modulation/Escape  | >5%       | 1                             |
| <b>S</b>     | W64R                   | Immune Modulation/Escape  | >5%       | 1                             |
| <b>S</b>     | Q1010R                 | Immune Modulation/Escape  | >5%       | 1                             |
| <b>S</b>     | P1162S                 | Immune Modulation/Escape  | >5%       | 2                             |
| <b>S</b>     | V1128A                 | Immune Modulation/Escape  | >5%       | 1                             |
| <b>S</b>     | H146Y                  | Immune Modulation/Escape  | >5%       | 1                             |
| <b>S</b>     | C15Y                   | Immune Modulation/Escape  | >5%       | 1                             |
| <b>S</b>     | K150R                  | Immune Modulation/Escape  | >50%      | 1                             |
| <b>S</b>     | P681R                  | Immune Modulation/Escape  | >50%      | 1                             |
| <b>S</b>     | F490L                  | Immune Modulation/Escape  | >50%      | 1                             |
| <b>S</b>     | F490S                  | Immune Modulation/Escape  | >50%      | 2                             |

**Supplementary Table 5 | Summary details of viral mutations for four post-molnupiravir treatment (>5 days) samples with culturable virus.** Total numbers of post-baseline transitions and transversions at  $\geq 5\%$  allele frequency per sample and details of amino acid changes are shown.

| Participant ID | Time (Days) | Number of transitions | Number of transversions | AA change from baseline                                                                                                                                                                                                                                                                                                                                                                                                                                                                                                                                                                     | Positive Day 14 VL |
|----------------|-------------|-----------------------|-------------------------|---------------------------------------------------------------------------------------------------------------------------------------------------------------------------------------------------------------------------------------------------------------------------------------------------------------------------------------------------------------------------------------------------------------------------------------------------------------------------------------------------------------------------------------------------------------------------------------------|--------------------|
| 45             | Day 6       | 9                     | 1                       | R408S, G295S, G133D, V1931I, A1812T, V699I, E381K, P34L, A143T, K160E                                                                                                                                                                                                                                                                                                                                                                                                                                                                                                                       | Yes                |
| 85             | Day 14      | 79                    | 2                       | R408S, N507I, A2129T, G251D, S1924N, S2535L, N192S, V2133I, A90V, T2306I, A2123T, H1613Y, S815P, D2544N, V84I, N43S, S201N, N2539D, T247I, V116A, A570T, R476H, A2575V, G120R, P1088L, D3511N, A1670V, N804D, V89I, D543N, C15Y, A217T, P820S, A607V, T49I, P3395H, A41V, D571N, G146D, V808I, T812I, P25S, V45I, L95S, V4I, M3280I, S778N, C1254Y, A2621T, C563Y, G11R, A1070T, V29I, M584V, T602I, P46S, P271L, R2818H, Y449H, A2745V, A656T, A4V, P792S, S461L, T334I, V1177I, S330L, R634H, E132K, K440R, T325I, H373Y, V1290I, A382V, P322S, H69Y, R3802H, G1068R, S173N, F13S, G2927S | Yes                |
| 557            | Day 7       | 35                    | 0                       | V544I, N3168D, S3195N, S34F, T2611I, E2617R, A3620V, K3630R, T3287I, V2816I, T2846I, T2906I, V244I, S50G, V70I, L7S, A64T, H245Y, E102K, V202I, V596M, V841I, M1057I, R173C, P461S, A1060T, D294N, T1322I, D909N, P1921L, F2182L, G2284S, T547I, V1765I, M1448I                                                                                                                                                                                                                                                                                                                             | Yes                |
| 530            | Day 6       | 1                     | 0                       | A181V                                                                                                                                                                                                                                                                                                                                                                                                                                                                                                                                                                                       | Yes                |

**Supplementary Table 6 | New post-baseline, consensus level (AF  $\geq$ 50%), missense transition (G->A or C->T) mutations at Day 14 for molnupiravir-treated and Usual Care participants. Total molnupiravir: 224 and Usual Care: 6.**

| <b>AA change</b> | <b>Mutation</b> | <b>Gene</b> | <b>Treatment</b> |
|------------------|-----------------|-------------|------------------|
| <b>D72N</b>      | G->A            | E           | Molnupiravir     |
| <b>L19F</b>      | C->T            | E           | Molnupiravir     |
| <b>A2T</b>       | G->A            | M           | Molnupiravir     |
| <b>R44K</b>      | G->A            | M           | Molnupiravir     |
| <b>D415N</b>     | G->A            | N           | Molnupiravir     |
| <b>G129D</b>     | G->A            | N           | Molnupiravir     |
| <b>H145Y</b>     | C->T            | N           | Molnupiravir     |
| <b>P365L</b>     | C->T            | N           | Molnupiravir     |
| <b>V246I</b>     | G->A            | N           | Molnupiravir     |
| <b>A130T</b>     | G->A            | NSP12       | Molnupiravir     |
| <b>A716V</b>     | C->T            | NSP12       | Molnupiravir     |
| <b>C22Y</b>      | G->A            | NSP12       | Molnupiravir     |
| <b>D303N</b>     | G->A            | NSP12       | Molnupiravir     |
| <b>G228D</b>     | G->A            | NSP12       | Molnupiravir     |
| <b>G228S</b>     | G->A            | NSP12       | Molnupiravir     |
| <b>H725Y</b>     | C->T            | NSP12       | Molnupiravir     |
| <b>H882Y</b>     | C->T            | NSP12       | Molnupiravir     |
| <b>P169S</b>     | C->T            | NSP12       | Molnupiravir     |
| <b>S15N</b>      | G->A            | NSP12       | Molnupiravir     |
| <b>S549N</b>     | G->A            | NSP12       | Molnupiravir     |
| <b>S778N</b>     | G->A            | NSP12       | Molnupiravir     |
| <b>T591I</b>     | C->T            | NSP12       | Molnupiravir     |
| <b>T76I</b>      | C->T            | NSP12       | Molnupiravir     |
| <b>V182I</b>     | G->A            | NSP12       | Molnupiravir     |
| <b>V234I</b>     | G->A            | NSP12       | Molnupiravir     |
| <b>V257I</b>     | G->A            | NSP12       | Molnupiravir     |
| <b>V359I</b>     | G->A            | NSP12       | Molnupiravir     |
| <b>V605I</b>     | G->A            | NSP12       | Molnupiravir     |
| <b>V905I</b>     | G->A            | NSP12       | Molnupiravir     |
| <b>A403T</b>     | G->A            | NSP13       | Molnupiravir     |
| <b>A454T</b>     | G->A            | NSP13       | Molnupiravir     |
| <b>A520T</b>     | G->A            | NSP13       | Molnupiravir     |
| <b>A568V</b>     | C->T            | NSP13       | Molnupiravir     |
| <b>D583N</b>     | G->A            | NSP13       | Molnupiravir     |
| <b>H290Y</b>     | C->T            | NSP13       | Molnupiravir     |
| <b>P491S</b>     | C->T            | NSP13       | Molnupiravir     |
| <b>P82L</b>      | C->T            | NSP13       | Molnupiravir     |
| <b>R339H</b>     | G->A            | NSP13       | Molnupiravir     |
| <b>R502H</b>     | G->A            | NSP13       | Molnupiravir     |
| <b>V340I</b>     | G->A            | NSP13       | Molnupiravir     |

|               |      |       |              |
|---------------|------|-------|--------------|
| <b>V479I</b>  | G->A | NSP13 | Molnupiravir |
| <b>V521I</b>  | G->A | NSP13 | Molnupiravir |
| <b>V98I</b>   | G->A | NSP13 | Molnupiravir |
| <b>L56F</b>   | C->T | NSP7  | Molnupiravir |
| <b>A150V</b>  | C->T | NSP8  | Molnupiravir |
| <b>P178S</b>  | C->T | NSP8  | Molnupiravir |
| <b>T148I</b>  | C->T | NSP8  | Molnupiravir |
| <b>V115I</b>  | G->A | NSP8  | Molnupiravir |
| <b>V34I</b>   | G->A | NSP8  | Molnupiravir |
| <b>A8T</b>    | G->A | ORF10 | Molnupiravir |
| <b>V32I</b>   | G->A | ORF10 | Molnupiravir |
| <b>A1074T</b> | G->A | ORF1a | Molnupiravir |
| <b>A1397V</b> | C->T | ORF1a | Molnupiravir |
| <b>A1677T</b> | G->A | ORF1a | Molnupiravir |
| <b>A1679T</b> | G->A | ORF1a | Molnupiravir |
| <b>A1739V</b> | C->T | ORF1a | Molnupiravir |
| <b>A1809V</b> | C->T | ORF1a | Molnupiravir |
| <b>A1923T</b> | G->A | ORF1a | Molnupiravir |
| <b>A206T</b>  | G->A | ORF1a | Molnupiravir |
| <b>A208T</b>  | G->A | ORF1a | Molnupiravir |
| <b>A2142V</b> | C->T | ORF1a | Molnupiravir |
| <b>A2213T</b> | G->A | ORF1a | Molnupiravir |
| <b>A2279T</b> | G->A | ORF1a | Molnupiravir |
| <b>A2344T</b> | G->A | ORF1a | Molnupiravir |
| <b>A239V</b>  | C->T | ORF1a | Molnupiravir |
| <b>A2584V</b> | C->T | ORF1a | Molnupiravir |
| <b>A2614T</b> | G->A | ORF1a | Molnupiravir |
| <b>A2614V</b> | C->T | ORF1a | Molnupiravir |
| <b>A2616T</b> | G->A | ORF1a | Molnupiravir |
| <b>A2745T</b> | G->A | ORF1a | Molnupiravir |
| <b>A2785T</b> | G->A | ORF1a | Molnupiravir |
| <b>A3023T</b> | G->A | ORF1a | Molnupiravir |
| <b>A3061T</b> | G->A | ORF1a | Molnupiravir |
| <b>A3220T</b> | G->A | ORF1a | Molnupiravir |
| <b>A3270T</b> | G->A | ORF1a | Molnupiravir |
| <b>A3571T</b> | G->A | ORF1a | Molnupiravir |
| <b>A3610V</b> | C->T | ORF1a | Molnupiravir |
| <b>A3615T</b> | G->A | ORF1a | Molnupiravir |
| <b>A3634T</b> | G->A | ORF1a | Molnupiravir |
| <b>A405T</b>  | G->A | ORF1a | Molnupiravir |
| <b>A482T</b>  | G->A | ORF1a | Molnupiravir |
| <b>A541T</b>  | G->A | ORF1a | Molnupiravir |
| <b>A555T</b>  | G->A | ORF1a | Molnupiravir |
| <b>A566T</b>  | G->A | ORF1a | Molnupiravir |

|               |      |       |              |
|---------------|------|-------|--------------|
| <b>A668V</b>  | C->T | ORF1a | Molnupiravir |
| <b>A773V</b>  | C->T | ORF1a | Molnupiravir |
| <b>A819T</b>  | G->A | ORF1a | Molnupiravir |
| <b>A876V</b>  | C->T | ORF1a | Molnupiravir |
| <b>A964T</b>  | G->A | ORF1a | Molnupiravir |
| <b>A967T</b>  | G->A | ORF1a | Molnupiravir |
| <b>C2180Y</b> | G->A | ORF1a | Molnupiravir |
| <b>C231Y</b>  | G->A | ORF1a | Molnupiravir |
| <b>C3762Y</b> | G->A | ORF1a | Molnupiravir |
| <b>C506Y</b>  | G->A | ORF1a | Molnupiravir |
| <b>C655Y</b>  | G->A | ORF1a | Molnupiravir |
| <b>C800Y</b>  | G->A | ORF1a | Molnupiravir |
| <b>D1179N</b> | G->A | ORF1a | Molnupiravir |
| <b>D1893N</b> | G->A | ORF1a | Molnupiravir |
| <b>D194N</b>  | G->A | ORF1a | Molnupiravir |
| <b>D466N</b>  | G->A | ORF1a | Molnupiravir |
| <b>D582N</b>  | G->A | ORF1a | Molnupiravir |
| <b>E102K</b>  | G->A | ORF1a | Molnupiravir |
| <b>E1086K</b> | G->A | ORF1a | Molnupiravir |
| <b>E2993K</b> | G->A | ORF1a | Molnupiravir |
| <b>E36K</b>   | G->A | ORF1a | Molnupiravir |
| <b>E640K</b>  | G->A | ORF1a | Molnupiravir |
| <b>E972K</b>  | G->A | ORF1a | Molnupiravir |
| <b>G1408S</b> | G->A | ORF1a | Molnupiravir |
| <b>G150D</b>  | G->A | ORF1a | Molnupiravir |
| <b>G2534S</b> | G->A | ORF1a | Molnupiravir |
| <b>G379E</b>  | G->A | ORF1a | Molnupiravir |
| <b>G49S</b>   | G->A | ORF1a | Molnupiravir |
| <b>G98D</b>   | G->A | ORF1a | Molnupiravir |
| <b>H2799Y</b> | C->T | ORF1a | Molnupiravir |
| <b>L320F</b>  | C->T | ORF1a | Molnupiravir |
| <b>L3829F</b> | C->T | ORF1a | Molnupiravir |
| <b>M2347I</b> | G->A | ORF1a | Molnupiravir |
| <b>M2719I</b> | G->A | ORF1a | Molnupiravir |
| <b>M3527I</b> | G->A | ORF1a | Molnupiravir |
| <b>M3621I</b> | G->A | ORF1a | Molnupiravir |
| <b>M3752I</b> | G->A | ORF1a | Molnupiravir |
| <b>M731I</b>  | G->A | ORF1a | Molnupiravir |
| <b>M789I</b>  | G->A | ORF1a | Molnupiravir |
| <b>M85I</b>   | G->A | ORF1a | Molnupiravir |
| <b>P1786S</b> | C->T | ORF1a | Molnupiravir |
| <b>P2018S</b> | C->T | ORF1a | Molnupiravir |
| <b>P2110L</b> | C->T | ORF1a | Molnupiravir |
| <b>P2685S</b> | C->T | ORF1a | Molnupiravir |



|               |      |       |              |
|---------------|------|-------|--------------|
| <b>P361S</b>  | C->T | ORF1a | Molnupiravir |
| <b>P67S</b>   | C->T | ORF1a | Molnupiravir |
| <b>P80S</b>   | C->T | ORF1a | Molnupiravir |
| <b>P820L</b>  | C->T | ORF1a | Molnupiravir |
| <b>P959S</b>  | C->T | ORF1a | Molnupiravir |
| <b>R207C</b>  | C->T | ORF1a | Molnupiravir |
| <b>R24H</b>   | G->A | ORF1a | Molnupiravir |
| <b>R3662C</b> | C->T | ORF1a | Molnupiravir |
| <b>R3821K</b> | G->A | ORF1a | Molnupiravir |
| <b>R550H</b>  | G->A | ORF1a | Molnupiravir |
| <b>R560H</b>  | G->A | ORF1a | Molnupiravir |
| <b>S1924N</b> | G->A | ORF1a | Molnupiravir |
| <b>S1952L</b> | C->T | ORF1a | Molnupiravir |
| <b>S911F</b>  | C->T | ORF1a | Molnupiravir |
| <b>T1004I</b> | C->T | ORF1a | Molnupiravir |
| <b>T1241I</b> | C->T | ORF1a | Molnupiravir |
| <b>T1429I</b> | C->T | ORF1a | Molnupiravir |
| <b>T1437I</b> | C->T | ORF1a | Molnupiravir |
| <b>T1678I</b> | C->T | ORF1a | Molnupiravir |
| <b>T1773I</b> | C->T | ORF1a | Molnupiravir |
| <b>T1890I</b> | C->T | ORF1a | Molnupiravir |
| <b>T2158I</b> | C->T | ORF1a | Molnupiravir |
| <b>T2264I</b> | C->T | ORF1a | Molnupiravir |
| <b>T265I</b>  | C->T | ORF1a | Molnupiravir |
| <b>T2910I</b> | C->T | ORF1a | Molnupiravir |
| <b>T3032I</b> | C->T | ORF1a | Molnupiravir |
| <b>T3462I</b> | C->T | ORF1a | Molnupiravir |
| <b>T3579I</b> | C->T | ORF1a | Molnupiravir |
| <b>T484I</b>  | C->T | ORF1a | Molnupiravir |
| <b>T568I</b>  | C->T | ORF1a | Molnupiravir |
| <b>T602I</b>  | C->T | ORF1a | Molnupiravir |
| <b>T821I</b>  | C->T | ORF1a | Molnupiravir |
| <b>V1056M</b> | G->A | ORF1a | Molnupiravir |
| <b>V1063I</b> | G->A | ORF1a | Molnupiravir |
| <b>V1122I</b> | G->A | ORF1a | Molnupiravir |
| <b>V1393M</b> | G->A | ORF1a | Molnupiravir |
| <b>V2238I</b> | G->A | ORF1a | Molnupiravir |
| <b>V2496M</b> | G->A | ORF1a | Molnupiravir |
| <b>V2754I</b> | G->A | ORF1a | Molnupiravir |
| <b>V2955M</b> | G->A | ORF1a | Molnupiravir |
| <b>V3120I</b> | G->A | ORF1a | Molnupiravir |
| <b>V3166I</b> | G->A | ORF1a | Molnupiravir |
| <b>V3593I</b> | G->A | ORF1a | Molnupiravir |
| <b>V3751I</b> | G->A | ORF1a | Molnupiravir |

|               |      |        |              |
|---------------|------|--------|--------------|
| <b>V3763I</b> | G->A | ORF1a  | Molnupiravir |
| <b>V3847I</b> | G->A | ORF1a  | Molnupiravir |
| <b>A100V</b>  | C->T | ORF1ab | Molnupiravir |
| <b>A319V</b>  | C->T | ORF1ab | Molnupiravir |
| <b>D827N</b>  | G->A | ORF1ab | Molnupiravir |
| <b>E453K</b>  | G->A | ORF1ab | Molnupiravir |
| <b>G416S</b>  | G->A | ORF1ab | Molnupiravir |
| <b>P140S</b>  | C->T | ORF1ab | Molnupiravir |
| <b>T472M</b>  | C->T | ORF1ab | Molnupiravir |
| <b>V1012I</b> | G->A | ORF1ab | Molnupiravir |
| <b>V269I</b>  | G->A | ORF1ab | Molnupiravir |
| <b>V421I</b>  | G->A | ORF1ab | Molnupiravir |
| <b>V713I</b>  | G->A | ORF1ab | Molnupiravir |
| <b>V841I</b>  | G->A | ORF1ab | Molnupiravir |
| <b>A99T</b>   | G->A | ORF3a  | Molnupiravir |
| <b>D238N</b>  | G->A | ORF3a  | Molnupiravir |
| <b>E241K</b>  | G->A | ORF3a  | Molnupiravir |
| <b>G100D</b>  | G->A | ORF3a  | Molnupiravir |
| <b>G49D</b>   | G->A | ORF3a  | Molnupiravir |
| <b>H150Y</b>  | C->T | ORF3a  | Molnupiravir |
| <b>L147F</b>  | C->T | ORF3a  | Molnupiravir |
| <b>L65F</b>   | C->T | ORF3a  | Molnupiravir |
| <b>P104S</b>  | C->T | ORF3a  | Molnupiravir |
| <b>V168I</b>  | G->A | ORF3a  | Molnupiravir |
| <b>V259I</b>  | G->A | ORF3a  | Molnupiravir |
| <b>A105T</b>  | G->A | ORF7a  | Molnupiravir |
| <b>A79V</b>   | C->T | ORF7a  | Molnupiravir |
| <b>D51N</b>   | G->A | ORF7a  | Molnupiravir |
| <b>T61I</b>   | C->T | ORF7a  | Molnupiravir |
| <b>Q35*</b>   | C->T | ORF7b  | Molnupiravir |
| <b>A15V</b>   | C->T | ORF8   | Molnupiravir |
| <b>A55T</b>   | G->A | ORF8   | Molnupiravir |
| <b>A1226V</b> | C->T | S      | Molnupiravir |
| <b>A263T</b>  | G->A | S      | Molnupiravir |
| <b>A570V</b>  | C->T | S      | Molnupiravir |
| <b>A653V</b>  | C->T | S      | Molnupiravir |
| <b>A672T</b>  | G->A | S      | Molnupiravir |
| <b>A67T</b>   | G->A | S      | Molnupiravir |
| <b>A684T</b>  | G->A | S      | Molnupiravir |
| <b>A829V</b>  | C->T | S      | Molnupiravir |
| <b>C1236Y</b> | G->A | S      | Molnupiravir |
| <b>D215N</b>  | G->A | S      | Molnupiravir |
| <b>G181E</b>  | G->A | S      | Molnupiravir |
| <b>H1088Y</b> | C->T | S      | Molnupiravir |

|               |      |       |              |
|---------------|------|-------|--------------|
| <b>Q954*</b>  | C->T | S     | Molnupiravir |
| <b>R1185H</b> | G->A | S     | Molnupiravir |
| <b>S1242N</b> | G->A | S     | Molnupiravir |
| <b>S689N</b>  | G->A | S     | Molnupiravir |
| <b>T1160I</b> | C->T | S     | Molnupiravir |
| <b>T547I</b>  | C->T | S     | Molnupiravir |
| <b>V1061I</b> | G->A | S     | Molnupiravir |
| <b>V622I</b>  | G->A | S     | Molnupiravir |
| <b>R146H</b>  | G->A | M     | Usual Care   |
| <b>P169S</b>  | C->T | NSP12 | Usual Care   |
| <b>A336V</b>  | C->T | NSP13 | Usual Care   |
| <b>T1754I</b> | C->T | ORF1a | Usual Care   |
| <b>S1587L</b> | C->T | ORF1a | Usual Care   |
| <b>V1291I</b> | G->A | ORF1a | Usual Care   |

---

**Supplementary Table 7 | COG-ID for 1436 whole genome sequence uploaded to CLIMB database.**

|              |              |              |              |              |              |
|--------------|--------------|--------------|--------------|--------------|--------------|
| LOND-YYBE13K | LOND-YYBEON5 | LOND-YYBEWZC | LOND-YYBEM13 | LOND-YYBEXJQ | LOND-YYBEKBD |
| LOND-YYBE18X | LOND-YYBEORZ | LOND-YYBEX15 | LOND-YYBEMPK | LOND-YYBEXKC | LOND-YYBEKEI |
| LOND-YYBE1B5 | LOND-YYBEOTH | LOND-YYBEX4M | LOND-YYBEMRH | LOND-YYBEXMK | LOND-YYBEKHC |
| LOND-YYBE1M8 | LOND-YYBEP3X | LOND-YYBEX5J | LOND-YYBEO14 | LOND-YYBEXPG | LOND-YYBEKI4 |
| LOND-YYBE1N3 | LOND-YYBEP5M | LOND-YYBEXD4 | LOND-YYBEOGU | LOND-YYBEXRA | LOND-YYBEKSA |
| LOND-YYBE1RI | LOND-YYBEP6F | LOND-YYBEXNH | LOND-YYBEOVS | LOND-YYBEZ3F | LOND-YYBEMAU |
| LOND-YYBE1T4 | LOND-YYBEP8W | LOND-YYBEXU3 | LOND-YYBEP9D | LOND-YYBEZ5B | LOND-YYBEMGA |
| LOND-YYBE1Y7 | LOND-YYBEPAT | LOND-YYBEXWZ | LOND-YYBEPDH | LOND-YYBEZ65 | LOND-YYBEMQE |
| LOND-YYBE18C | LOND-YYBEPT9 | LOND-YYBE15G | LOND-YYBEPJO | LOND-YYBE16Y | LOND-YYBEOC8 |
| LOND-YYBEIFO | LOND-YYBEPYN | LOND-YYBE1CF | LOND-YYBEPKQ | LOND-YYBE1HR | LOND-YYBEOIW |
| LOND-YYBEIPY | LOND-YYBEQ1H | LOND-YYBE1EP | LOND-YYBEPOB | LOND-YYBE1JM | LOND-YYBEOPF |
| LOND-YYBEIQ6 | LOND-YYBEQ4C | LOND-YYBE1GT | LOND-YYBEPU5 | LOND-YYBE1KJ | LOND-YYBEOS1 |
| LOND-YYBEIWT | LOND-YYBEQ5K | LOND-YYBE31T | LOND-YYBEPW3 | LOND-YYBE1PD | LOND-YYBEPHJ |
| LOND-YYBEIZM | LOND-YYBEQFZ | LOND-YYBE363 | LOND-YYBEQ7G | LOND-YYBE1QB | LOND-YYBEPIZ |
| LOND-YYBEJ1B | LOND-YYBEQJX | LOND-YYBE3N1 | LOND-YYBEQ8U | LOND-YYBE3C6 | LOND-YYBEPMC |
| LOND-YYBEJ6J | LOND-YYBEQKP | LOND-YYBE3WP | LOND-YYBEQCJ | LOND-YYBE3GK | LOND-YYBEPSI |
| LOND-YYBEJ8A | LOND-YYBEQR3 | LOND-YYBE3YS | LOND-YYBEQHE | LOND-YYBE3H7 | LOND-YYBEQB9 |
| LOND-YYBEJ98 | LOND-YYBEQWA | LOND-YYBE4DX | LOND-YYBEQSW | LOND-YYBE3JR | LOND-YYBEQIS |
| LOND-YYBEJES | LOND-YYBESBZ | LOND-YYBE4FM | LOND-YYBESEJ | LOND-YYBE3OI | LOND-YYBEQN7 |
| LOND-YYBEJOF | LOND-YYBETAP | LOND-YYBE4KB | LOND-YYBESIQ | LOND-YYBE3Q4 | LOND-YYBEQP8 |
| LOND-YYBEK40 | LOND-YYBETBH | LOND-YYBE4T1 | LOND-YYBESMD | LOND-YYBE3RQ | LOND-YYBEQXD |
| LOND-YYBEK5Q | LOND-YYBETJC | LOND-YYBEAC9 | LOND-YYBESOA | LOND-YYBE3Sj | LOND-YYBEQZ1 |
| LOND-YYBEKG3 | LOND-YYBETPR | LOND-YYBEAGM | LOND-YYBESP9 | LOND-YYBE488 | LOND-YYBES1W |
| LOND-YYBEKR7 | LOND-YYBETQN | LOND-YYBEARX | LOND-YYBESWO | LOND-YYBE4BU | LOND-YYBES4R |
| LOND-YYBEKWH | LOND-YYBETY6 | LOND-YYBEATW | LOND-YYBETDA | LOND-YYBE4C7 | LOND-YYBES76 |
| LOND-YYBEKYF | LOND-YYBEU1Z | LOND-YYBEAX3 | LOND-YYBETHF | LOND-YYBE4XZ | LOND-YYBESAE |
| LOND-YYBEM9F | LOND-YYBEU5F | LOND-YYBEI95 | LOND-YYBETKK | LOND-YYBEA3R | LOND-YYBESKF |
| LOND-YYBEMBN | LOND-YYBEU69 | LOND-YYBEIAJ | LOND-YYBETO7 | LOND-YYBEABI | LOND-YYBESRT |
| LOND-YYBEMHM | LOND-YYBEU7B | LOND-YYBEIEK | LOND-YYBEU97 | LOND-YYBEAH6 | LOND-YYBET6B |
| LOND-YYBEMJ1 | LOND-YYBEUB4 | LOND-YYBEIHB | LOND-YYBEUDS | LOND-YYBEAKD | LOND-YYBET7D |
| LOND-YYBEMKO | LOND-YYBEUJK | LOND-YYBEIJE | LOND-YYBEUMG | LOND-YYBEASK | LOND-YYBETFW |

|              |              |               |              |              |              |
|--------------|--------------|---------------|--------------|--------------|--------------|
| LOND-YYBEMSZ | LOND-YYBEUKE | LOND-YYBEISP  | LOND-YYBEUQY | LOND-YYBEAWQ | LOND-YYBETRS |
| LOND-YYBEMU7 | LOND-YYBEUNA | LOND-YYBEJ3U  | LOND-YYBEURW | LOND-YYBEI1I | LOND-YYBETUZ |
| LOND-YYBEMZI | LOND-YYBEUYH | LOND-YYBEJ4T  | LOND-YYBEUSX | LOND-YYBEIBA | LOND-YYBEUCR |
| LOND-YYBEO3C | LOND-YYBEW66 | LOND-YYBEJMO  | LOND-YYBEW9H | LOND-YYBEIKG | LOND-YYBEUF1 |
| LOND-YYBEOAQ | LOND-YYBEW7Y | LOND-YYBEJU9  | LOND-YYBEWAK | LOND-YYBEIO3 | LOND-YYBEW3E |
| LOND-YYBEOJP | LOND-YYBEWGX | LOND-YYBEKX8  | LOND-YYBEWTA | LOND-YYBEIY4 | LOND-YYBEW4G |
| LOND-YYBEOKM | LOND-YYBEWQ9 | LOND-YYBEM19  | LOND-YYBEX6D | LOND-YYBEK7K | LOND-YYBEWB3 |
| LOND-YYBEOMJ | LOND-YYBEWX7 | LOND-YYBEMF4  | LOND-YYBEXH8 | LOND-YYBEK8Z | LOND-YYBEWJJ |
| LOND-YYBEWNZ | LOND-YYBJE8Z | LOND-YYBJPFS  | LOND-YYBJGAS | LOND-YYBJRHO | LOND-YYBJCQF |
| LOND-YYBEX9B | LOND-YYBJE9G | LOND-YYBJPPII | LOND-YYBJGEZ | LOND-YYBJRPX | LOND-YYBJDBE |
| LOND-YYBEXFS | LOND-YYBJEAW | LOND-YYBJPQR  | LOND-YYBJGS4 | LOND-YYBJRSH | LOND-YYBJDC1 |
| LOND-YYBEXII | LOND-YYBJEG3 | LOND-YYBJPWZ  | LOND-YYBJK30 | LOND-YYBJRTG | LOND-YYBJENB |
| LOND-YYBEXSU | LOND-YYBJEOR | LOND-YYBJQC8  | LOND-YYBJK8I | LOND-YYBE3Z8 | LOND-YYBJESA |
| LOND-YYBEXZT | LOND-YYBJEU6 | LOND-YYBJQO6  | LOND-YYBJKN9 | LOND-YYBE456 | LOND-YYBJF5T |
| LOND-YYBEZ8K | LOND-YYBJEX8 | LOND-YYBJQXB  | LOND-YYBJKTY | LOND-YYBE4P5 | LOND-YYBJGKU |
| LOND-YYBEZBS | LOND-YYBJF1D | LOND-YYBJRDD  | LOND-YYBJKUH | LOND-YYBE755 | LOND-YYBJK9R |
| LOND-YYBEZD1 | LOND-YYBJF3I | LOND-YYBJRJZ  | LOND-YYBJKYD | LOND-YYBE9Y0 | LOND-YYBJKJT |
| LOND-YYBEZJG | LOND-YYBJFCO | LOND-YYBJRMU  | LOND-YYBJKZW | LOND-YYBEA7H | LOND-YYBJME1 |
| LOND-YYBEZOZ | LOND-YYBJFDN | LOND-YYBJRNF  | LOND-YYBJM4P | LOND-YYBEH5H | LOND-YYBJMPE |
| LOND-YYBEZQH | LOND-YYBJFKW | LOND-YYBJRQP  | LOND-YYBJM78 | LOND-YYBESNI | LOND-YYBJNJ3 |
| LOND-YYBEZSM | LOND-YYBJFO8 | LOND-YYBJRWY  | LOND-YYBJMFA | LOND-YYBEUT3 | LOND-YYBJNTE |
| LOND-YYBEZWX | LOND-YYBJFQC | LOND-YYBJRXM  | LOND-YYBJMGS | LOND-YYBEZ1U | LOND-YYBJNWN |
| LOND-YYBE1AC | LOND-YYBJFW9 | LOND-YYBESFX  | LOND-YYBJMHJ | LOND-YYBJ8W7 | LOND-YYBJPMK |
| LOND-YYBEO9Y | LOND-YYBJFYE | LOND-YYBJ84T  | LOND-YYBJMIZ | LOND-YYBJ8ZZ | LOND-YYBJPXN |
| LOND-YYBESHY | LOND-YYBJGND | LOND-YYBJ87M  | LOND-YYBJMW3 | LOND-YYBJBRR | LOND-YYBJQMJ |
| LOND-YYBEX3P | LOND-YYBJGUY | LOND-YYBJ8NN  | LOND-YYBJN5W | LOND-YYBJC5K | LOND-YYBE5AD |
| LOND-YYBJ81B | LOND-YYBJGXJ | LOND-YYBJ8R6  | LOND-YYBJN7O | LOND-YYBJCZ1 | LOND-YYBJD5U |
| LOND-YYBJ8CQ | LOND-YYBJGY8 | LOND-YYBJB7T  | LOND-YYBJNRD | LOND-YYBJGHQ | LOND-YYBJD6P |
| LOND-YYBJ8HP | LOND-YYBJK4Q | LOND-YYBJC8U  | LOND-YYBJNXP | LOND-YYBJGOG | LOND-YYBJEQJ |
| LOND-YYBJ8JW | LOND-YYBJK5C | LOND-YYBJCMM  | LOND-YYBJP4M | LOND-YYBJGPP | LOND-YYBJFNR |
| LOND-YYBJ8OF | LOND-YYBJK7E | LOND-YYBJCOY  | LOND-YYBJPGW | LOND-YYBJM9D | LOND-YYBJG1N |
| LOND-YYBJ8QK | LOND-YYBJKCM | LOND-YYBJCR3  | LOND-YYBJPJQ | LOND-YYBJMKQ | LOND-YYBJGIH |
| LOND-YYBJ8TD | LOND-YYBJKD7 | LOND-YYBJCWA  | LOND-YYBJPKC | LOND-YYBJMR4 | LOND-YYBJKGZ |

|                  |                  |                  |                  |                  |                  |
|------------------|------------------|------------------|------------------|------------------|------------------|
| LOND-<br>YYJB9P  | LOND-YYBJKIA     | LOND-<br>YYBJD9M | LOND-YYBJPRA     | LOND-YYBJNBJ     | LOND-<br>YYBJKQ8 |
| LOND-<br>YYBJC3Q | LOND-<br>YYBJM6F | LOND-<br>YYBJDHT | LOND-<br>YYBJPSU | LOND-YYBJP5J     | LOND-<br>YYBJNQX |
| LOND-<br>YYBJC9N | LOND-<br>YYBJM8W | LOND-<br>YYBJDQQ | LOND-YYBJPT7     | LOND-YYBJPAX     | LOND-<br>YYBJO8X |
| LOND-<br>YYBJCB9 | LOND-<br>YYBJMBY | LOND-<br>YYBJDRN | LOND-<br>YYBJPU3 | LOND-YYBJQ8T     | LOND-<br>YYBJOAC |
| LOND-YYBJCIS     | LOND-<br>YYBJMCK | LOND-<br>YYBJDUD | LOND-YYBJPZT     | LOND-<br>YYBJQD3 | LOND-<br>YYBJOJM |
| LOND-<br>YYBJCSW | LOND-<br>YYBJMOB | LOND-<br>YYBJE4O | LOND-<br>YYBJQB7 | LOND-<br>YYBE9OX | LOND-<br>YYBJON3 |
| LOND-<br>YYBJCT6 | LOND-<br>YYBJMSI | LOND-<br>YYBJEHC | LOND-YYBJQFI     | LOND-<br>YYBEAP7 | LOND-<br>YYBJOQB |
| LOND-<br>YYBJD8H | LOND-<br>YYBJMT9 | LOND-<br>YYBJEMX | LOND-YYBJQJP     | LOND-YYBEI79     | LOND-<br>YYBJOY7 |
| LOND-<br>YYBJDA3 | LOND-<br>YYBJMXR | LOND-<br>YYBJER7 | LOND-<br>YYBJQPF | LOND-<br>YYBESQ7 | LOND-<br>YYBJQHG |
| LOND-<br>YYBJDE4 | LOND-<br>YYBJN9C | LOND-<br>YYBJETN | LOND-<br>YYBJQRZ | LOND-<br>YYBETZX | LOND-<br>YYBJQWS |
| LOND-YYBJDI9     | LOND-<br>YYBJNA4 | LOND-<br>YYBJEYF | LOND-<br>YYBJQY9 | LOND-<br>YYBEUHD | LOND-<br>YYBJRE3 |
| LOND-<br>YYBJDKS | LOND-<br>YYBJP15 | LOND-<br>YYBJF6M | LOND-<br>YYBJR4W | LOND-<br>YYBEZRO | LOND-<br>YYBJX13 |
| LOND-<br>YYBJE1Y | LOND-<br>YYBJP3P | LOND-<br>YYBJF84 | LOND-<br>YYBJR6C | LOND-YYBJ8K1     | LOND-<br>YYBJX6B |
| LOND-<br>YYBJE6E | LOND-<br>YYBJP9B | LOND-<br>YYBJG9E | LOND-<br>YYBJRAA | LOND-<br>YYBJC7G | LOND-<br>YYBJXAP |
| LOND-<br>YYBJXBH | LOND-YYBJB5I     | LOND-<br>YYBJNE5 | LOND-<br>YYBJA3N | LOND-<br>YYBJQAQ | LOND-<br>YYBJXQN |
| LOND-<br>YYBJXFW | LOND-<br>YYBJBCW | LOND-<br>YYBJNH1 | LOND-YYBJA4Y     | LOND-YYBJQS1     | LOND-<br>YYBJXRS |
| LOND-<br>YYBJXKK | LOND-<br>YYBJBEH | LOND-YYBJNIY     | LOND-<br>YYBJAQ3 | LOND-<br>YYBJQUA | LOND-YYBJXT5     |
| LOND-<br>YYBJXN4 | LOND-<br>YYBJBFN | LOND-<br>YYBJNKZ | LOND-<br>YYBJH1C | LOND-YYBJS11     | LOND-<br>YYBJXUZ |
| LOND-<br>YYBJXO7 | LOND-<br>YYBJBHU | LOND-<br>YYBJNYM | LOND-<br>YYBJH36 | LOND-YYBJS3R     | LOND-<br>YYBJXZX |
| LOND-<br>YYBJXPR | LOND-<br>YYBJBKA | LOND-<br>YYBJR3S | LOND-<br>YYBJH6W | LOND-YYBJS4N     | LOND-<br>YYBJZ63 |
| LOND-<br>YYBJXST | LOND-<br>YYBJD3Z | LOND-<br>YYBJR7Q | LOND-<br>YYBJHF8 | LOND-YYBJS7H     | LOND-<br>YYBJZC6 |
| LOND-<br>YYBJXWI | LOND-<br>YYBJD7X | LOND-<br>YYBJRCT | LOND-<br>YYBJHGF | LOND-YYBJSBI     | LOND-<br>YYBJZGK |
| LOND-<br>YYBJYGB | LOND-<br>YYBJDFY | LOND-YYBJRI6     | LOND-<br>YYBJHM5 | LOND-YYBJSC9     | LOND-YYBJZJR     |
| LOND-<br>YYBE4HH | LOND-<br>YYBJDJA | LOND-YYBJRKI     | LOND-<br>YYBJHTQ | LOND-YYBJSE8     | LOND-<br>YYBJZKN |
| LOND-<br>YYBE573 | LOND-<br>YYBJDMW | LOND-<br>YYBJROE | LOND-<br>YYBJHYT | LOND-YYBJSKD     | LOND-<br>YYBJZMY |
| LOND-<br>YYBE5GE | LOND-<br>YYBJDPO | LOND-YYBJRYJ     | LOND-<br>YYBJHZN | LOND-YYBJSOS     | LOND-<br>YYBJZQ4 |
| LOND-<br>YYBE64H | LOND-<br>YYBJDS7 | LOND-<br>YYBJYMZ | LOND-<br>YYBJTDS | LOND-YYBJSQ5     | LOND-<br>YYBJZRQ |
| LOND-<br>YYBE6BX | LOND-<br>YYBJDT8 | LOND-<br>YYBJYPU | LOND-<br>YYBJU67 | LOND-YYBJT3J     | LOND-<br>YYBJZTU |
| LOND-<br>YYBE6K7 | LOND-<br>YYBJDWB | LOND-<br>YYBJYSY | LOND-<br>YYBJUY4 | LOND-YYBJT5F     | LOND-<br>YYBJZUX |
| LOND-<br>YYBE7MH | LOND-<br>YYBJDXC | LOND-<br>YYBJYTK | LOND-<br>YYBJX3M | LOND-YYBJT97     | LOND-<br>YYBJZWP |
| LOND-<br>YYBE7NQ | LOND-<br>YYBJDYK | LOND-<br>YYBJYWR | LOND-<br>YYBJ1GX | LOND-<br>YYBJTAM | LOND-<br>YYBJ31X |
| LOND-<br>YYBE7PA | LOND-<br>YYBJEBD | LOND-<br>YYBJ3QA | LOND-<br>YYBJ1Q9 | LOND-<br>YYBJTGO | LOND-<br>YYBJ3AD |
| LOND-<br>YYBE9DK | LOND-<br>YYBJEPM | LOND-<br>YYBJ3RC | LOND-<br>YYBJ1SQ | LOND-YYBJTJK     | LOND-<br>YYBJ3B1 |

|              |              |              |              |               |              |
|--------------|--------------|--------------|--------------|---------------|--------------|
| LOND-YYBE9EY | LOND-YYBJEZS | LOND-YYBJ43Y | LOND-YYBJ3ER | LOND-YYBJTO5  | LOND-YYBJ3CH |
| LOND-YYBE9KH | LOND-YYBJFGH | LOND-YYBJ4IE | LOND-YYBJ3UP | LOND-YYBJTWU  | LOND-YYBJ3DQ |
| LOND-YYBE9ZB | LOND-YYBJFHX | LOND-YYBJ45G | LOND-YYBJABU | LOND-YYBJUBA  | LOND-YYBJ3KY |
| LOND-YYBEH3Y | LOND-YYBJFJS | LOND-YYBJ4TO | LOND-YYBJHUK | LOND-YYBJUEK  | LOND-YYBJ3M6 |
| LOND-YYBEHDP | LOND-YYBJFM1 | LOND-YYBJ4ZR | LOND-YYBJI5B | LOND-YYBJUFO  | LOND-YYBJ3NO |
| LOND-YYBEHFJ | LOND-YYBJGR9 | LOND-YYBJ51P | LOND-YYBJIEE | LOND-YYBJUHB  | LOND-YYBJ3ZF |
| LOND-YYBEHK9 | LOND-YYBJGW6 | LOND-YYBJ5DC | LOND-YYBJIRO | LOND-YYBJUPY  | LOND-YYBJ41Q |
| LOND-YYBEHUC | LOND-YYBJK16 | LOND-YYBJ61K | LOND-YYBJIYA | LOND-YYBJUWT  | LOND-YYBJ45H |
| LOND-YYBEJPC | LOND-YYBJKA1 | LOND-YYBJ63H | LOND-YYBJO1A | LOND-YYBJW5N  | LOND-YYBJ46S |
| LOND-YYBEJR6 | LOND-YYBJKBB | LOND-YYBJ6IR | LOND-YYBJO3K | LOND-YYBJW8M  | LOND-YYBJ47A |
| LOND-YYBEPXR | LOND-YYBJKHK | LOND-YYBJ6PI | LOND-YYBJOEP | LOND-YYBJWFX  | LOND-YYBJ48F |
| LOND-YYBJ8AI | LOND-YYBJKMP | LOND-YYBJ76U | LOND-YYBJOGT | LOND-YYBJWMD  | LOND-YYBJ4BT |
| LOND-YYBJ8DY | LOND-YYBJKPF | LOND-YYBJ78N | LOND-YYBJOHR | LOND-YYBJWPD  | LOND-YYBJ4ED |
| LOND-YYBJ8FH | LOND-YYBJKXF | LOND-YYBJ7DK | LOND-YYBJOM8 | LOND-YYBJWQ7  | LOND-YYBJ4G8 |
| LOND-YYBJ8G4 | LOND-YYBJMYN | LOND-YYBJ7IF | LOND-YYBJOPD | LOND-YYBJWSC  | LOND-YYBJ4H4 |
| LOND-YYBJ8MO | LOND-YYBJN3A | LOND-YYBJ7J6 | LOND-YYBJOPD | LOND-YYBJX4J  | LOND-YYBJ4P3 |
| LOND-YYBJ8PC | LOND-YYBJN4S | LOND-YYBJ7KH | LOND-YYBJOZQ | LOND-YYBJX99  | LOND-YYBJ4QZ |
| LOND-YYBJ8XE | LOND-YYBJN6Q | LOND-YYBJ7OX | LOND-YYBJQ4K | LOND-YYBJXEQ  | LOND-YYBJ4WK |
| LOND-YYBJ8YG | LOND-YYBJN87 | LOND-YYBJ7RE | LOND-YYBJQ7R | LOND-YYBJXIU  | LOND-YYBJ4XI |
| LOND-YYBJB18 | LOND-YYBJNCU | LOND-YYBJ7SD | LOND-YYBJQ9Y | LOND-YYBJXME  | LOND-YYBJ4YU |
| LOND-YYBJ547 | LOND-YYBJAZG | LOND-YYBJ5TX | LOND-YYBJNG9 | LOND-YYBJS64  | LOND-YYBJWZK |
| LOND-YYBJ5AB | LOND-YYBJH4H | LOND-YYBJ5UM | LOND-YYBJNS6 | LOND-YYBJSGM  | LOND-YYBJXG1 |
| LOND-YYBJ5EN | LOND-YYBJH54 | LOND-YYBJ5WJ | LOND-YYBJP6D | LOND-YYBJSIC  | LOND-YYBJZ59 |
| LOND-YYBJ5GG | LOND-YYBJH7S | LOND-YYBJ6A6 | LOND-YYBJYUG | LOND-YYBJSJF  | LOND-YYBJZAF |
| LOND-YYBJ5H3 | LOND-YYBJH91 | LOND-YYBJ6CZ | LOND-YYBJ13E | LOND-YYBJSMB  | LOND-YYBJZBW |
| LOND-YYBJ5OT | LOND-YYBJHBX | LOND-YYBJ6J7 | LOND-YYBJ15R | LOND-YYBJSMP7 | LOND-YYBJZIM |
| LOND-YYBJ5RK | LOND-YYBJHDM | LOND-YYBJ6K5 | LOND-YYBJ1DI | LOND-YYBJSRX  | LOND-YYBJ18P |
| LOND-YYBJ5XW | LOND-YYBJHEB | LOND-YYBJ6M3 | LOND-YYBJ1IO | LOND-YYBJSTW  | LOND-YYBJ19H |
| LOND-YYBJ6DJ | LOND-YYBJHIG | LOND-YYBJ737 | LOND-YYBJ1JJ | LOND-YYBJSWQ  | LOND-YYBJ1B3 |
| LOND-YYBJ6E9 | LOND-YYBJHJ9 | LOND-YYBJ7A9 | LOND-YYBJ1RU | LOND-YYBJSX3  | LOND-YYBJ1CD |
| LOND-YYBJ6FF | LOND-YYBJHQI | LOND-YYBJ7GR | LOND-YYBJ1UW | LOND-YYBJSZE  | LOND-YYBJ1FT |
| LOND-YYBJ6OQ | LOND-YYBJHRJ | LOND-YYBJ7M4 | LOND-YYBJ1W1 | LOND-YYBJT69  | LOND-YYBJ1O4 |
| LOND-YYBJ6QU | LOND-YYBJHWE | LOND-YYBJ7W8 | LOND-YYBJ1ZC | LOND-YYBJTF1  | LOND-YYBJ1X7 |

|              |              |              |              |              |              |
|--------------|--------------|--------------|--------------|--------------|--------------|
| LOND-YYBJ6R8 | LOND-YYBJHXU | LOND-YYBJ7YO | LOND-YYBJAC7 | LOND-YYBJTHD | LOND-YYBJC1H |
| LOND-YYBJ6SN | LOND-YYBJJD1 | LOND-YYBJA56 | LOND-YYBJADX | LOND-YYBJTNA | LOND-YYBJC4C |
| LOND-YYBJ6TC | LOND-YYBJTRW | LOND-YYBJA9S | LOND-YYBJAJD | LOND-YYBJTSX | LOND-YYBJCD5 |
| LOND-YYBJ6UE | LOND-YYBJZ1T | LOND-YYBJAUQ | LOND-YYBJARP | LOND-YYBJTX6 | LOND-YYBJEKT |
| LOND-YYBJ6WG | LOND-YYBJZFC | LOND-YYBJH8D | LOND-YYBJI1U | LOND-YYBJTZP | LOND-YYBJM3X |
| LOND-YYBJ6XT | LOND-YYBJZPH | LOND-YYBJHAY | LOND-YYBJI4D | LOND-YYBJU1I | LOND-YYBJOCF |
| LOND-YYBJ745 | LOND-YYBJ1NZ | LOND-YYBJHK7 | LOND-YYBJI77 | LOND-YYBJU79 | LOND-YYBJOFU |
| LOND-YYBJ79T | LOND-YYBJ3FK | LOND-YYBJHOO | LOND-YYBJIA8 | LOND-YYBJU8C | LOND-YYBJOSO |
| LOND-YYBJ7BQ | LOND-YYBJ3GE | LOND-YYBJHSR | LOND-YYBJIBS | LOND-YYBJUDW | LOND-YYBJOT4 |
| LOND-YYBJ7CA | LOND-YYBJ3H5 | LOND-YYBJQ14 | LOND-YYBJIFQ | LOND-YYBJUIX | LOND-YYBJOWW |
| LOND-YYBJ7EY | LOND-YYBJ3P4 | LOND-YYBJT48 | LOND-YYBJIH9 | LOND-YYBJUKG | LOND-YYBJPEO |
| LOND-YYBJ7HZ | LOND-YYBJ4AN | LOND-YYBJXDA | LOND-YYBJJG  | LOND-YYBJUQ6 | LOND-YYBJQ3C |
| LOND-YYBJ7NC | LOND-YYBJ4DP | LOND-YYBJZ8E | LOND-YYBJIKR | LOND-YYBJUR1 | LOND-YYBJQ5E |
| LOND-YYBJ7PS | LOND-YYBJ4JB | LOND-YYBE3KN | LOND-YYBJINW | LOND-YYBJUSP | LOND-YYBJQ6N |
| LOND-YYBJ7QW | LOND-YYBJ4K9 | LOND-YYBE5CH | LOND-YYBJIP6 | LOND-YYBJW4R | LOND-YYBJQIW |
| LOND-YYBJ7TP | LOND-YYBJ4M7 | LOND-YYBE5JN | LOND-YYBJIUT | LOND-YYBJW6H | LOND-YYBJQN5 |
| LOND-YYBJ7UJ | LOND-YYBJ4NX | LOND-YYBE5WM | LOND-YYBJIWX | LOND-YYBJWAE | LOND-YYBJQTH |
| LOND-YYBJ7X1 | LOND-YYBJ4O1 | LOND-YYBE7TX | LOND-YYBJIX4 | LOND-YYBJWBZ | LOND-YYBJT1Z |
| LOND-YYBJA10 | LOND-YYBJ56I | LOND-YYBE96U | LOND-YYBJIZJ | LOND-YYBJWCB | LOND-YYBJT8Q |
| LOND-YYBJA6A | LOND-YYBJ59U | LOND-YYBEHP3 | LOND-YYBJO4E | LOND-YYBJWHY | LOND-YYBJTB4 |
| LOND-YYBJA74 | LOND-YYBJ5B0 | LOND-YYBJ8ES | LOND-YYBJO5G | LOND-YYBJWIQ | LOND-YYBJTCR |
| LOND-YYBJAIK | LOND-YYBJ5C4 | LOND-YYBJBXQ | LOND-YYBJO6Y | LOND-YYBJWKF | LOND-YYBJTKE |
| LOND-YYBJANT | LOND-YYBJ5JY | LOND-YYBJGDB | LOND-YYBJO7N | LOND-YYBJWTS | LOND-YYBJTMG |
| LOND-YYBJASE | LOND-YYBJ5K6 | LOND-YYBJKON | LOND-YYBJOKJ | LOND-YYBJWU1 | LOND-YYBJTUI |
| LOND-YYBJAT1 | LOND-YYBJ5MH | LOND-YYBJKR5 | LOND-YYBJPYY | LOND-YYBJWX5 | LOND-YYBJTYH |
| LOND-YYBJAWC | LOND-YYBJ5NQ | LOND-YYBJMU5 | LOND-YYBJQZO | LOND-YYBJWY3 | LOND-YYBJU5D |
| LOND-YYBJUCN | LOND-YYBJAXZ | LOND-YYBE1OH | LOND-YYBEMCC | LOND-YYBEWDI | LOND-YYBE7OT |
| LOND-YYBJUJE | LOND-YYBJAYI | LOND-YYBE1X9 | LOND-YYBEMD6 | LOND-YYBEWHN | LOND-YYBE7QS |
| LOND-YYBJUNS | LOND-YYBJHC3 | LOND-YYBE1ZQ | LOND-YYBEMEW | LOND-YYBEWIO | LOND-YYBE7WJ |
| LOND-YYBJUTZ | LOND-YYBJHPZ | LOND-YYBEICN | LOND-YYBEMTB | LOND-YYBEWK8 | LOND-YYBE91M |
| LOND-YYBJWDU | LOND-YYBJI3F | LOND-YYBEIDW | LOND-YYBEMW5 | LOND-YYBEWSQ | LOND-YYBE97I |
| LOND-YYBJWEJ | LOND-YYBJI65 | LOND-YYBEIR1 | LOND-YYBEMYR | LOND-YYBEWUW | LOND-YYBE98N |
| LOND-YYBJWGP | LOND-YYBJI8K | LOND-YYBEIUU | LOND-YYBEO6N | LOND-YYBEX81 | LOND-YYBE9FG |



|                  |                  |                  |                  |                  |                  |
|------------------|------------------|------------------|------------------|------------------|------------------|
| LOND-<br>YYBJWRT | LOND-YYBJICY     | LOND-<br>YYBEJ5X | LOND-<br>YYBEO8T | LOND-<br>YYBEXAX | LOND-<br>YYBE9PS |
| LOND-<br>YYBJX7D | LOND-<br>YYBJIOZ | LOND-<br>YYBEJ7M | LOND-<br>YYBEOB7 | LOND-<br>YYBEXB6 | LOND-<br>YYBE9RE |
| LOND-<br>YYBJX8O | LOND-<br>YYBJIQH | LOND-YYBEJAI     | LOND-<br>YYBEOFI | LOND-<br>YYBEXT7 | LOND-<br>YYBE9W8 |
| LOND-<br>YYBJXHF | LOND-<br>YYBJO96 | LOND-<br>YYBEJCQ | LOND-<br>YYBEOQD | LOND-<br>YYBE196 | LOND-<br>YYBEA11 |
| LOND-YYBJXJC     | LOND-<br>YYBJOB5 | LOND-<br>YYBEJDY | LOND-<br>YYBEOXB | LOND-YYBE1I1     | LOND-<br>YYBEA4N |
| LOND-<br>YYBJ14G | LOND-YYBJO11     | LOND-<br>YYBEJFH | LOND-<br>YYBEOZO | LOND-<br>YYBE1US | LOND-<br>YYBEH46 |
| LOND-<br>YYBJ166 | LOND-<br>YYBJORI | LOND-<br>YYBEJG4 | LOND-<br>YYBEP4P | LOND-<br>YYBE1WW | LOND-<br>YYBEHC5 |
| LOND-<br>YYBJ1EM | LOND-<br>YYBJSAG | LOND-<br>YYBEJHP | LOND-<br>YYBEP78 | LOND-<br>YYBE375 | LOND-<br>YYBEHJB |
| LOND-<br>YYBJ1HN | LOND-<br>YYBJSdT | LOND-YYBEJ15     | LOND-<br>YYBEPCK | LOND-<br>YYBE3AF | LOND-<br>YYBEHM7 |
| LOND-<br>YYBJ1K8 | LOND-<br>YYBJSFP | LOND-<br>YYBEJQK | LOND-<br>YYBEPE1 | LOND-<br>YYBE3BW | LOND-<br>YYBEHO1 |
| LOND-<br>YYBJ1MF | LOND-<br>YYBJS6  | LOND-<br>YYBEJS3 | LOND-<br>YYBEPFA | LOND-<br>YYBE3IM | LOND-<br>YYBEHRM |
| LOND-<br>YYBJ1TA | LOND-<br>YYBJSNU | LOND-<br>YYBEJTD | LOND-<br>YYBEPGS | LOND-<br>YYBE410 | LOND-<br>YYBEHSG |
| LOND-<br>YYBJ36Z | LOND-<br>YYBJT7B | LOND-<br>YYBEJW7 | LOND-<br>YYBEPZU | LOND-<br>YYBE43N | LOND-<br>YYBEHXI |
| LOND-<br>YYBJ373 | LOND-<br>YYBJU95 | LOND-<br>YYBEJXE | LOND-<br>YYBEQ3Q | LOND-<br>YYBE474 | LOND-YYBEI4F     |
| LOND-YYBJ3IJ     | LOND-YYBJUAJ     | LOND-<br>YYBEJZZ | LOND-<br>YYBEQ9N | LOND-YYBE4JD     | LOND-YYBEI67     |
| LOND-YYBJ3JN     | LOND-<br>YYBJUMR | LOND-<br>YYBEK1Y | LOND-<br>YYBEQAO | LOND-<br>YYBE4Q3 | LOND-<br>YYBEIMR |
| LOND-<br>YYBJ3TT | LOND-<br>YYBJUXH | LOND-<br>YYBEK31 | LOND-<br>YYBEQET | LOND-<br>YYBE4ZG | LOND-<br>YYBEK6E |
| LOND-<br>YYBJ3XS | LOND-<br>YYBJUZM | LOND-<br>YYBEK9G | LOND-<br>YYBEQMM | LOND-<br>YYBE5B1 | LOND-<br>YYBEM3T |
| LOND-<br>YYBJ3YW | LOND-<br>YYBJW1W | LOND-<br>YYBEKCP | LOND-<br>YYBEQOY | LOND-<br>YYBE5FK | LOND-<br>YYBEM4X |
| LOND-<br>YYBJ4C5 | LOND-<br>YYBJW3G | LOND-<br>YYBEKD9 | LOND-<br>YYBEQT6 | LOND-<br>YYBE5H5 | LOND-<br>YYBEO7R |
| LOND-<br>YYBJ4RM | LOND-<br>YYBJW76 | LOND-<br>YYBEKF5 | LOND-<br>YYBET3M | LOND-<br>YYBE636 | LOND-<br>YYBEQD5 |
| LOND-YYBJ5I8     | LOND-<br>YYBJWJ8 | LOND-<br>YYBEKJU | LOND-<br>YYBET8O | LOND-<br>YYBE654 | LOND-<br>YYBES3G |
| LOND-<br>YYBJ5PA | LOND-<br>YYBJWOA | LOND-<br>YYBEKMX | LOND-<br>YYBET99 | LOND-<br>YYBE691 | LOND-<br>YYBES6H |
| LOND-<br>YYBJ5QS | LOND-<br>YYBJZ3D | LOND-<br>YYBEKNB | LOND-<br>YYBETEQ | LOND-<br>YYBE6F8 | LOND-<br>YYBESGP |
| LOND-<br>YYBJ5ZD | LOND-<br>YYBJZ4B | LOND-<br>YYBEKOR | LOND-<br>YYBETME | LOND-<br>YYBE6HA | LOND-YYBESJ8     |
| LOND-<br>YYBJA88 | LOND-<br>YYBJZEG | LOND-<br>YYBEKPM | LOND-<br>YYBETST | LOND-<br>YYBE6M5 | LOND-<br>YYBEUAM |
| LOND-<br>YYBJAFM | LOND-<br>YYBJZH7 | LOND-<br>YYBEKQJ | LOND-<br>YYBEU8Q | LOND-<br>YYBE6PZ | LOND-<br>YYBEUGO |
| LOND-YYBJAGJ     | LOND-<br>YYBJZN1 | LOND-<br>YYBEKTN | LOND-<br>YYBEUWU | LOND-<br>YYBE6TQ | LOND-<br>YYBEUZP |
| LOND-<br>YYBJAHH | LOND-<br>YYBJZOI | LOND-<br>YYBEKU6 | LOND-<br>YYBEUX6 | LOND-<br>YYBE7C4 | LOND-<br>YYBEW1S |
| LOND-<br>YYBJAKB | LOND-YYBJZSJ     | LOND-<br>YYBEKZS | LOND-<br>YYBEW5R | LOND-<br>YYBE7DC | LOND-<br>YYBEWFT |
| LOND-<br>YYBJAM9 | LOND-<br>YYBJZXA | LOND-<br>YYBEM5P | LOND-<br>YYBEW8P | LOND-<br>YYBE7EN | LOND-<br>YYBEXO9 |
| LOND-<br>YYBJAOW | LOND-<br>YYBE1FU | LOND-<br>YYBEM7J | LOND-<br>YYBEWCD | LOND-<br>YYBE7GG | LOND-<br>YYBEXQR |
| LOND-<br>YYBEZCY | LOND-<br>YYBE7SF | LOND-YYBJYIN     | LOND-<br>YYBESCB | LOND-<br>YYBE3PH | LOND-YYBJE31     |

|                                                      |                                                                                                                                                                                                                                                                                                                                                                                                                                                                                                                                                                                                                                                                                  |                                                                                                                                      |                                                                                                                                                                                                                                                                                                                                                                                                                                                                                                                                      |                                                                                                                                                                                                                                                                                  |                                                                                                                                                                              |                                                     |              |              |              |              |                                  |                                  |                                                                                                                                                          |                  |                                                                                                                                                          |                                                                                                                                                                              |                                  |              |                                  |                                  |              |                  |
|------------------------------------------------------|----------------------------------------------------------------------------------------------------------------------------------------------------------------------------------------------------------------------------------------------------------------------------------------------------------------------------------------------------------------------------------------------------------------------------------------------------------------------------------------------------------------------------------------------------------------------------------------------------------------------------------------------------------------------------------|--------------------------------------------------------------------------------------------------------------------------------------|--------------------------------------------------------------------------------------------------------------------------------------------------------------------------------------------------------------------------------------------------------------------------------------------------------------------------------------------------------------------------------------------------------------------------------------------------------------------------------------------------------------------------------------|----------------------------------------------------------------------------------------------------------------------------------------------------------------------------------------------------------------------------------------------------------------------------------|------------------------------------------------------------------------------------------------------------------------------------------------------------------------------|-----------------------------------------------------|--------------|--------------|--------------|--------------|----------------------------------|----------------------------------|----------------------------------------------------------------------------------------------------------------------------------------------------------|------------------|----------------------------------------------------------------------------------------------------------------------------------------------------------|------------------------------------------------------------------------------------------------------------------------------------------------------------------------------|----------------------------------|--------------|----------------------------------|----------------------------------|--------------|------------------|
| LOND-<br>YYBEZUT<br>LOND-<br>YYBJ3WM<br>LOND-YYBJ4FJ | LOND-<br>YYBE9A9<br>LOND-<br>YYBE9M4<br>LOND-<br>YYBE9QW<br>LOND-<br>YYBE9SD<br>LOND-<br>YYBE9TP<br>LOND-<br>YYBEA9A<br>LOND-<br>YYBEADT<br>LOND-<br>YYBEAIC<br>LOND-<br>YYBEAMB<br>LOND-<br>YYBEAOS<br>LOND-<br>YYBEH1Q<br>LOND-<br>YYBEH6S<br>LOND-<br>YYBEH7A<br>LOND-<br>YYBEH9W<br>LOND-<br>YYBEHAN<br>LOND-<br>YYBEHIE<br>LOND-<br>YYBEHNX<br>LOND-<br>YYBEHWK<br>LOND-<br>YYBEHZR<br>LOND-<br>YYBEI5D<br>LOND-<br>YYBEINS<br>LOND-<br>YYBEMXG<br>LOND-<br>YYBE05E<br>LOND-<br>YYBE0HG<br>LOND-<br>YYBE0Y9<br>LOND-<br>YYBEPR4<br>LOND-<br>YYBESDU<br>LOND-<br>YYBESZK<br>LOND-<br>YYBEXGW<br>LOND-<br>YYBEZ4D<br>LOND-<br>YYBEZfq<br>LOND-<br>YYBEZP6<br>LOND-<br>YYBJBMS | LOND-<br>YYBE3MY<br>LOND-<br>YYBE4AR<br>LOND-<br>YYBE4M9<br>LOND-<br>YYBE4WC<br>LOND-<br>YYBE51X<br>LOND-<br>YYBE56Z<br>LOND-YYBE5Jj | LOND-<br>YYBE5NO<br>LOND-<br>YYBE5QA<br>LOND-<br>YYBE5RC<br>LOND-<br>YYBE5UP<br>LOND-<br>YYBE6AY<br>LOND-<br>YYBE6EB<br>LOND-<br>YYBE6RJ<br>LOND-<br>YYBE6SR<br>LOND-<br>YYBE6UK<br>LOND-<br>YYBE6YT<br>LOND-<br>YYBE79U<br>LOND-<br>YYBE718<br>LOND-<br>YYBE7UM<br>LOND-<br>YYBE7XW<br>LOND-<br>YYBE7Y1<br>LOND-<br>YYBE9CA<br>LOND-<br>YYBE9GR<br>LOND-<br>YYBE9NC<br>LOND-<br>YYBE9UJ<br>LOND-<br>YYBE9X1<br>LOND-<br>YYBEA8j<br>LOND-<br>YYBEAE8<br>LOND-<br>YYBEAFP<br>LOND-<br>YYBEAJF<br>LOND-<br>YYBEH8F<br>LOND-<br>YYBEHED | LOND-<br>YYBESTS<br>LOND-<br>YYBESU1<br>LOND-<br>YYBESX5<br>LOND-<br>YYBETWI<br>LOND-<br>YYBEU3J<br>LOND-<br>YYBEZA8<br>LOND-<br>YYBEZEE<br>LOND-<br>YYBEZH9<br>LOND-<br>YYBEZNW<br>LOND-<br>YYBEZX4<br>LOND-<br>YYBJB33<br>LOND-<br>YYBJB4Z<br>LOND-<br>YYBJBDG<br>LOND-YYBJBIB | LOND-<br>YYBE3UX<br>LOND-<br>YYBE3XA<br>LOND-<br>YYBE4NT<br>LOND-<br>YYBE4SE<br>LOND-<br>YYBE5ER<br>LOND-<br>YYBE5KY<br>LOND-<br>YYBE5TT<br>LOND-<br>YYBE61C<br>LOND-YYBE6IG | LOND-<br>YYBE5Q<br>LOND-<br>YYBJED9<br>LOND-YYBJE14 | LOND-YYBJEJU | LOND-YYBJF9j | LOND-YYBJFI7 | LOND-YYBJFTF | LOND-<br>YYBJFUB<br>LOND-YYBJFZ3 | LOND-<br>YYBJG5O<br>LOND-YYBJGJj | LOND-<br>YYBJGMT<br>LOND-<br>YYBJGTR<br>LOND-<br>YYBJGZA<br>LOND-<br>YYBJMDH<br>LOND-<br>YYBJMJO<br>LOND-<br>YYBJMZU<br>LOND-<br>YYBJNUR<br>LOND-YYBJP81 | LOND-<br>YYBE9J6 | LOND-<br>YYBEA64<br>LOND-<br>YYBEANU<br>LOND-<br>YYBEAQ5<br>LOND-<br>YYBEAZE<br>LOND-<br>YYBEHBT<br>LOND-<br>YYBEQ6R<br>LOND-<br>YYBESY3<br>LOND-YYBET4j | LOND-<br>YYBJPH8<br>LOND-<br>YYBJPO9<br>LOND-<br>YYBJQKM<br>LOND-<br>YYBJS9A<br>LOND-<br>YYBJWNI<br>LOND-<br>YYBJYD8<br>LOND-<br>YYBJZ9Z<br>LOND-<br>YYBE14E<br>LOND-YYBE4YI | LOND-<br>YYBEZKR<br>LOND-YYBJ898 | LOND-YYBJ8I5 | LOND-<br>YYBE6C3<br>LOND-YYBE7JY | LOND-<br>YYBEIXH<br>LOND-YYBEJK1 | LOND-YYBJBGY | LOND-<br>YYBEKAW |
|------------------------------------------------------|----------------------------------------------------------------------------------------------------------------------------------------------------------------------------------------------------------------------------------------------------------------------------------------------------------------------------------------------------------------------------------------------------------------------------------------------------------------------------------------------------------------------------------------------------------------------------------------------------------------------------------------------------------------------------------|--------------------------------------------------------------------------------------------------------------------------------------|--------------------------------------------------------------------------------------------------------------------------------------------------------------------------------------------------------------------------------------------------------------------------------------------------------------------------------------------------------------------------------------------------------------------------------------------------------------------------------------------------------------------------------------|----------------------------------------------------------------------------------------------------------------------------------------------------------------------------------------------------------------------------------------------------------------------------------|------------------------------------------------------------------------------------------------------------------------------------------------------------------------------|-----------------------------------------------------|--------------|--------------|--------------|--------------|----------------------------------|----------------------------------|----------------------------------------------------------------------------------------------------------------------------------------------------------|------------------|----------------------------------------------------------------------------------------------------------------------------------------------------------|------------------------------------------------------------------------------------------------------------------------------------------------------------------------------|----------------------------------|--------------|----------------------------------|----------------------------------|--------------|------------------|

|                  |                  |                  |                  |                  |                  |
|------------------|------------------|------------------|------------------|------------------|------------------|
| LOND-<br>YYBE78R | LOND-<br>YYBJBQO | LOND-<br>YYBEHG8 | LOND-<br>YYBJYAH | LOND-YYBJBTJ     | LOND-<br>YYBEOEX |
| LOND-<br>YYBE7BO | LOND-<br>YYBJY1E | LOND-<br>YYBEHQZ | LOND-YYBJYJ5     | LOND-YYBJCYB     | LOND-<br>YYBEQYB |
| LOND-<br>YYBE7H3 | LOND-<br>YYBJY4A | LOND-<br>YYBEHTO | LOND-YYBJYK3     | LOND-YYBJD1F     | LOND-<br>YYBET13 |
| LOND-<br>YYBE7K6 | LOND-<br>YYBJYBM | LOND-<br>YYBEHYU | LOND-YYBJYNJ     | LOND-<br>YYBJDNG | LOND-<br>YYBETG1 |
| LOND-<br>YYBE7RK | LOND-<br>YYBJYHW | LOND-<br>YYBEO4K | LOND-<br>YYBE34B | LOND-<br>YYBJDZ5 | LOND-<br>YYBEWEM |
| LOND-<br>YYBEWO4 | LOND-<br>YYBJC6R | LOND-YYBJCJX     | LOND-<br>YYBJCXD | LOND-<br>YYBJG7C | LOND-<br>YYBJKSS |
| LOND-<br>YYBJ8U9 | LOND-<br>YYBJCAO | LOND-<br>YYBJCKP | LOND-YYBJE7K     | LOND-YYBJGBF     | LOND-<br>YYBJKW4 |
| LOND-<br>YYBJB6X | LOND-<br>YYBJCFZ | LOND-<br>YYBJCN7 | LOND-YYBJFAZ     | LOND-YYBJKEU     | LOND-<br>YYBJM5M |
| LOND-<br>YYBJBOM | LOND-<br>YYBJCHE | LOND-<br>YYBJCP8 | LOND-<br>YYBJG3W | LOND-YYBJKF3     | LOND-<br>YYBJMAT |
| LOND-<br>YYBJRUN | LOND-<br>YYBJRG7 | LOND-<br>YYBJR9K | LOND-<br>YYBJQEX | LOND-YYBJPD4     | LOND-<br>YYBJNDF |
| LOND-<br>YYBJTQY | LOND-YYBJYCI     |                  |                  |                  |                  |

---

### **PANORAMIC Trial Collaborative Group:**

Haroon Ahmed, Tanveer Ahmed, Damien Allcock, Sarah Barrett, Clare Bateman, Adrian Beltran-Martinez, Oluseye E Benedict, Magdalena Benysek, Nicholas S Berry, Nigel Bird, Laura Brennan, Gerard Burns, Daniel Butler, Mike Butler, Andrew Carson-Stevens, Jem Chalk, Zelda Cheng, Maria Coates, Lucy Cureton, Ruth Danson, Jennifer C Davies, Nigel de Kare-Silver, Michelle A Detry, Devesh Dhasmana, Jon Dickson, Melissa Dobson, Sarah Dowsell, Serge Engamba, Stacey Fisher, Robin Fox, Mark Fitzgerald, Eve Frost, Ushma Galal, Richard Gaunt, Sarit Ghosh, Ishtiaq Gilkar, Anna Goodman, Steve Granier, Radhika Gulati, Aleksandra Howell, Iqbal Hussain, Elizabeth Hadley, Victoria Harris, Jane Holmes, Simon Hutchinson, Marie Imlach, Greg Irving, Nicholas Jacobsen, James Kennard, Umar Khan, Kyle Knox, Christopher Krasucki, Layla Lavalley, Tom Law, Rem Lee, Nicola Lester, David Lewis, James Lunn, Claire I Mackintosh, Tracie-Ann Madden, Mehul Mathukia, Joe Marion, Micheal McKenna, Patrick Moore, Sam Mort, Seb Morton, Daniel Murphy, Lazaro Mwandigha, Rhiannon Nally, Chinonso Ndukauba, Emma Ogburn, Olufunto Ogundapo, Henry Okeke, Alice Packham, Amit Patel, Kavil Patel, Mahendra G Patel, Ruth Penfold, May Ee Png, Stavros Petrou, Satveer Poonian, Olajide Popoola, Alexander Pora, Vibhore Prasad, Rishabh Prasad, Ivy Raymundo-Wood, Omair Razzaq, Scot Richardson, Simon Royal, Heather Rutter, Afsana Safa, Christina T Saunders, Benjamin R Saville, Satash Sehdev, Tamsin Sevenoaks, Aadil Sheikh, Vanessa Short, Baljinder S Sidhu, Ivor Singh, Yusuf Soni, Andrew Ustianowski, Pete Wilson, David Wingfield, Michael Wong, Nick Wooding, Sharon Woods, Joanna Yong.
